# Supplementary material
Source: ML conference proceedings conference paper supplement (https://openreview.net/forum?id=JfaWawZ8BmX)
Supplement: supplementary_material [file attachment]

## Supplementary Material: Anisotropic Random Feature Regression in High Dimensions

### TABLE OF CONTENTS: SUPPLEMENTARY MATERIAL

|                                                              |           |
|--------------------------------------------------------------|-----------|
| <b>A Additional discussion of related work</b>               | <b>2</b>  |
| A.1 Asymptotic error formulas and Theorem 3.1                | 2         |
| A.2 Gaussian equivalents                                     | 2         |
| A.3 Weight-data alignment                                    | 3         |
| <b>B Useful inequalities</b>                                 | <b>3</b>  |
| B.1 Basic properties of the self-consistent equation for $x$ | 3         |
| B.2 $\mathcal{I}$ and $\mathcal{I}^\beta$ inequalities       | 5         |
| <b>C Weight-data alignment is a partial order</b>            | <b>6</b>  |
| <b>D Proofs of propositions</b>                              | <b>6</b>  |
| D.1 Proposition 3.1                                          | 6         |
| D.2 Proposition 3.2                                          | 7         |
| D.3 Proposition 3.3                                          | 7         |
| D.4 Proposition 3.4                                          | 8         |
| <b>E Linear regression limit</b>                             | <b>10</b> |
| E.1 Comparison to Mel & Ganguli (2021)                       | 10        |
| E.2 Comparison to Wu & Xu (2020)                             | 11        |
| <b>F Structured learning curves</b>                          | <b>12</b> |
| F.1 Effect of spectral gap                                   | 12        |
| F.2 Analysis of the D-scale model in the separated limit     | 14        |
| <b>G Proof of Theorem 3.1</b>                                | <b>15</b> |
| G.1 Decomposition of the test loss                           | 15        |
| G.2 Decomposition of the bias and total variance             | 16        |
| G.3 Summary of linearized trace terms                        | 17        |
| G.4 Calculation of error terms                               | 18        |
| G.5 Final result for bias, variance, and test error          | 31        |

### A.1 ASYMPTOTIC ERROR FORMULAS AND THEOREM 3.1

Our technical approach proceeds in a substantially different manner, using tools from random matrix theory and operator-valued free probability, rather than statistical physics techniques or the replica method. The results could be made entirely rigorous, though here we simply present the pertinent calculations and defer justification of the underlying linearization techniques to future work and to (Tripuraneni et al., 2021a,b). Our analysis ultimately yields final expressions with a relatively simple form, involving only a single scalar self-consistent equation, which lends itself to more straightforward downstream calculations and analysis (e.g. Propositions 3.1, 3.4 and Corollary G.1). Finally, beyond the total error, we also derive formulas for the bias and variance, which aid significantly in the interpretation of the phenomenology, and are novel results. Interestingly, the order parameter  $Q$  from d’Ascoli et al. (2021) (and others) is interpreted as the variance of the student’s outputs, but actually differs from the variance defined in Eq. (6). The reason is that the bias-variance decomposition is defined *conditionally* on  $\mathbf{x}$ . Because the conditional mean is nonzero, i.e.  $\mathbb{E}[\hat{y}|\mathbf{x}] \neq 0$ ,  $Q$  actually corresponds to an uncentered second moment, and corresponds to our term  $E_3$  (defined in Eq. (S147)) which differs from the total variance by the non-trivial additive term  $E_4 = \mathbb{E}_{\mathbf{x}}[\mathbb{E}[\hat{y}|\mathbf{x}]^2]$  (defined in Eq. (S162)). A more thorough discussion of these and related concepts is given by Adlam & Pennington (2020b).

## A.2 GAUSSIAN EQUIVALENTS

2

& Pennington (2020a). As mentioned previously, an extension to anisotropic Gaussian covariates was later developed by Tripuraneni et al. (2021a,b), which is the basis for our analysis in this work.

In a parallel and largely independent line of work stemming from Goldt et al. (2020a), a nearly identical approach is developed under the name of the *Gaussian equivalence property*, under which a possibly nonlinear target function and/or prediction are replaced with simple linear Gaussian equivalents. This is a crucial step in the analysis in Goldt et al. (2020b); Gerace et al. (2020); d’Ascoli et al. (2021) and related work. For example, Gerace et al. (2020) use this principle (in fact, a stronger version they refer to as “replicated Gaussian equivalence”) in order to perform their replica analysis of the isotropic random feature model. Subsequently, in the isotropic setting, this principle was rigorously justified using the Lindeburg exchange method under a variety of technical assumptions on the data distribution, weight distributions, nonlinear activation function, and target function (Hu & Lu, 2021). Goldt et al. (2020b) relaxes some of these conditions and provides extensive tests of the resulting formulas on real-world datasets. To perform the analysis for *anisotropic* input data and target function weights, as is pursued in d’Ascoli et al. (2021), an anisotropic extension of the Gaussian equivalence theorem is required. Substantial numerical evidence and theoretical arguments are presented by d’Ascoli et al. (2021); Loureiro et al. (2021) for the validity of this extension, but to the best of our knowledge a rigorous proof in this context has not been established.

### A.3 WEIGHT-DATA ALIGNMENT

One of the basic conclusions of our study of anisotropy is that weight-data alignment generally improves performance. Similar observations appear in several recent works, albeit in slightly different contexts. For example, Ghorbani et al. (2019) study the random feature model with isotropic inputs, but anisotropic *weights*, in the case of a fixed quadratic target function and derives an asymptotic formula for the test error in the population limit (ie.  $m \gg n_0, n_1$ ). For wide networks,  $n_1 \gg n_0$ , the error simplifies and is exactly proportional to a simple measure of alignment between the random feature weights and the target, that is loosely related to the measure we propose in Definition 2.1.

Ghorbani et al. (2021) also study the random feature model in the population limit, and makes the assumption that the target function is sensitive to a much lower dimensional subspace of the input by positing sub-linear scaling of the dimensionality of the relevant subspace. They show that increasing the power of the input data in this subspace generally decreases test error and the number of random features required to learn a function of fixed complexity. Although the learning contexts and the final scaling limits for  $m, n_0, n_1$  are distinct, these phenomena parallel our main result on alignment (see e.g. Fig. 3b for illustration in the context of the  $d$ -scale model).

A main contribution of the current paper is the partial order on the space of weight-data alignments, which allows us to prove that the total error and the bias decrease in response to stronger alignment (Proposition 3.3). Our results in this vein are most directly related to those of d’Ascoli et al. (2021), who informally observe a basic relationship between weight-data alignment and performance, though the impact of alignment is also investigated elsewhere, e.g. Loureiro et al. (2021, Fig. 2). While these works informally examine concept of alignment, the conclusions about it derive from numerical evaluation of the formulas, and as such the generality of some of the results remains unclear and some of the underlying phenomena are partially obfuscated. For example, it is not clear why the “isotropic” and “misaligned” curves cross each other in of d’Ascoli et al. (2021, Fig. 2c): naively, one might expect the misaligned model to always perform worse. Our results provide a nice perspective on this behavior: owing to the differing covariate distributions, the two forms of alignment are incomparable under the partial order.

## B USEFUL INEQUALITIES

Here we include the statements and proofs of several auxiliary inequalities that we use throughout the Supplementary Material.

### B.1 BASIC PROPERTIES OF THE SELF-CONSISTENT EQUATION FOR $x$

We begin by reviewing the basic inequalities, first given in (Tripuraneni et al., 2021a,b). The definitions of the following quantities can be found in Theorem 3.1.

**Lemma B.1** (Adapted from (Tripuraneni et al., 2021a,b)). *We have the following bounds:  $\omega, \tau_1, \bar{\tau}_1, x, \mathcal{I}_{a,b}, \mathcal{I}_{a,b}^\beta \geq 0$  and  $\frac{\partial x}{\partial \gamma} \leq 0$ .*

*Proof.* As shown in (Pennington & Worah, 2018) for the unit-variance case, a simple Hermite expansion argument establishes the relation  $\eta \geq \zeta$ , which implies  $\omega = s(\eta/\zeta - 1) \geq 0$ . From Appendix G.4.1  $\tau_1$  and  $\bar{\tau}_1$  are traces of positive semi-definite matrices and are therefore nonnegative. From the same equations, it follows that  $x = \gamma \rho \tau_1 \bar{\tau}_1 \geq 0$ . Nonnegativity of  $x$  implies  $\mathcal{I}_{a,b} \geq 0$  and  $\mathcal{I}_{a,b}^\beta \geq 0$  from their definitions in (12). Finally, using the nonnegativity of  $\omega, \tau_1, \bar{\tau}_1, x$ , and  $\mathcal{I}_{a,b}$ , the expression for  $\frac{\partial x}{\partial \gamma}$  in Theorem 3.1 immediately gives,

$$\frac{\partial x}{\partial \gamma} = -\frac{x}{\gamma + \rho\gamma(\frac{\psi}{\phi}\tau_1 + \bar{\tau}_1)(\omega + \phi\mathcal{I}_{1,2})} \leq 0. \quad (\text{S1})$$

□

Next we show that the self-consistent equation  $x = \frac{1-\gamma\tau_1}{\omega+\mathcal{I}_{1,1}}$  appearing in Theorem 3.1 and defined in (S237) admits a unique positive real solution for  $x$ .

**Lemma B.2** (Adapted from (Tripuraneni et al., 2021a,b)). *There is a unique real  $x \geq 0$  satisfying  $x = \frac{1-\gamma\tau_1}{\omega+\mathcal{I}_{1,1}}$ .*

*Proof.* Let  $t = 1/x \geq 0$  and define,

$$h(t) = t \left( \frac{\rho(\psi - \phi) + \sqrt{\rho^2(\psi - \phi)^2 + 4\gamma\rho\phi\psi/t}}{2\rho\psi} - 1 \right) + \omega + \mathcal{I}_{1,1}(1/t), \quad (\text{S2})$$

which is a rewriting of eqn. (S237), so it suffices to show that  $h$  admits a unique real positive root. To that end, first observe that  $\lim_{t \rightarrow 0} \mathcal{I}_{1,1}(1/t) = 0$  and  $\lim_{t \rightarrow \infty} \mathcal{I}_{1,1}(1/t) = s$  so that

$$h(0) = \omega > 0 \quad \text{and} \quad \lim_{t \rightarrow \infty} h(t)/t = -\min\{1, \phi/\psi\} < 0, \quad (\text{S3})$$

which together imply that  $h$  has an odd number of positive real roots. Next, we show that  $h$  is concave for  $t \geq 0$ :

$$h''(t) = -\frac{2\phi}{t^3} \left( \frac{\gamma^2 \rho \phi \psi}{(\rho^2(\psi - \phi)^2 + 4\gamma\rho\phi\psi/t)^{3/2}} + \mathcal{I}_{2,3}(1/t) \right) \quad (\text{S4})$$

$$\leq 0, \quad (\text{S5})$$

which implies that  $h$  has at most two positive real roots. Therefore, we conclude that  $h$  has exactly one positive real root. To provide a bounding interval for this root, we first observe that,

$$\lim_{t \rightarrow \infty} h(t) - \left( -\min\{1, \phi/\psi\}t + \omega + s + \frac{\gamma\phi}{\rho|\psi - \phi|} \right) = 0, \quad (\text{S6})$$

so that  $h(t)$  can be upper- and lower-bounded by linear functions ,

$$\omega - \min\{1, \phi/\psi\}t \leq h(t) \leq \omega + s + \frac{\gamma\phi}{\rho|\psi - \phi|} - \min\{1, \phi/\psi\}t. \quad (\text{S7})$$

The roots of these linear functions bound the root of  $h$ , so we have

$$\frac{\min\{1, \phi/\psi\}}{\frac{\gamma\phi}{\rho|\psi - \phi|} + \omega + s} \leq x \leq \frac{\min\{1, \phi/\psi\}}{\omega}. \quad (\text{S8})$$

□

## B.2 $\mathcal{I}$ AND $\mathcal{I}^\beta$ INEQUALITIES

We now establish some useful properties of the  $\mathcal{I}$  and  $\mathcal{I}^\beta$  functionals defined in (12). To begin, we note that simple algebraic manipulations establish the following raising and lowering identities:

$$\mathcal{I}_{a-1,b-1} = \phi \mathcal{I}_{a-1,b} + x \mathcal{I}_{a,b} \quad \text{and} \quad \mathcal{I}_{a-1,b-1}^\beta = \phi \mathcal{I}_{a-1,b}^\beta + x \mathcal{I}_{a,b}^\beta. \quad (\text{S9})$$

Next, we consider how the partial order of LJSs given in Definition 2.1 leads to inequalities on the  $\mathcal{I}^\beta$  functionals. Letting  $(\mathcal{I}_{a,b}^\beta)_1$  and  $(\mathcal{I}_{a,b}^\beta)_2$  to denote the corresponding functionals with the LJSs  $\mu_1$  and  $\mu_2$  respectively, we can establish the following useful lemma.

**Lemma B.3** (Adapted from (Tripuraneni et al., 2021a,b)). *Let  $\mu_1 \leq \mu_2$ , so  $\mu_1$  is more strongly aligned than  $\mu_2$  (recall Definition 2.1). Suppose the functions  $f, g, h : \mathbb{R} \rightarrow \mathbb{R}$  are such that  $f(\lambda) = g(\lambda)h(\lambda)$  and  $h(\lambda)$  is nonincreasing for all  $\lambda > 0$ , then*

$$\frac{\mathbb{E}_{\mu_1}[qf(\lambda)]}{\mathbb{E}_{\mu_2}[qf(\lambda)]} \leq \frac{\mathbb{E}_{\mu_1}[qg(\lambda)]}{\mathbb{E}_{\mu_2}[qg(\lambda)]}. \quad (\text{S10})$$

*Proof.* By the law of iterated expectation, we have

$$\mathbb{E}_{\mu_1}[qf(\lambda)] = \mathbb{E}_{\mu_2}[qg(\lambda)] \mathbb{E}_\lambda \left[ \frac{\mathbb{E}_{\mu_2}[qg(\lambda)|\lambda]}{\mathbb{E}_{\mu_2}[qg(\lambda)]} \frac{\mathbb{E}_{\mu_1}[q|\lambda]}{\mathbb{E}_{\mu_2}[q|\lambda]} h(\lambda) \right]. \quad (\text{S11})$$

Note that the expectation  $\mathbb{E}_\lambda$  in (S11) over  $\lambda$  is the same under  $\mu_1$  and  $\mu_2$  by assumption. Moreover, the function  $h(\lambda)$  is nonincreasing in  $\lambda$  by assumption. Finally, observe that the factor  $\mathbb{E}_{\mu_2}[qg(\lambda)|\lambda]/\mathbb{E}_{\mu_2}[qg(\lambda)]$  defines a change in distribution for the random variable  $\lambda$ , since taking its expectation over  $\lambda$  yields 1. Denote a new random with this distribution by  $\tilde{\lambda}$ . Then, we may apply the Harris inequality to see

$$\mathbb{E}_{\mu_1}[qf(\lambda)] = \mathbb{E}_{\mu_2}[qg(\lambda)] \mathbb{E}_{\tilde{\lambda}} \left[ \frac{\mathbb{E}_{\mu_1}[q|\tilde{\lambda}]}{\mathbb{E}_{\mu_2}[q|\tilde{\lambda}]} h(\tilde{\lambda}) \right] \quad (\text{S12})$$

$$\leq \mathbb{E}_{\mu_2}[qg(\lambda)] \mathbb{E}_{\tilde{\lambda}} \left[ \frac{\mathbb{E}_{\mu_1}[q|\tilde{\lambda}]}{\mathbb{E}_{\mu_2}[q|\tilde{\lambda}]} \right] \mathbb{E}_{\tilde{\lambda}} [h(\tilde{\lambda})] \quad (\text{S13})$$

$$\leq \mathbb{E}_{\mu_2}[qg(\lambda)] \mathbb{E}_\lambda \left[ \frac{\mathbb{E}_{\mu_2}[qg(\lambda)|\lambda]}{\mathbb{E}_{\mu_2}[qg(\lambda)]} \frac{\mathbb{E}_{\mu_1}[q|\lambda]}{\mathbb{E}_{\mu_2}[q|\lambda]} \right] \mathbb{E}_\lambda \left[ \frac{\mathbb{E}_{\mu_2}[qg(\lambda)|\lambda]}{\mathbb{E}_{\mu_2}[qg(\lambda)]} h(\lambda) \right] \quad (\text{S14})$$

$$= \frac{\mathbb{E}_{\mu_1}[qg(\lambda)]}{\mathbb{E}_{\mu_2}[qg(\lambda)]} \mathbb{E}_{\mu_2}[qf(\lambda)]. \quad (\text{S15})$$

□

**Corollary B.1.** *Let  $\mu_1 \leq \mu_2$  and  $(\mathcal{I}_{a,b}^\beta)_i := \phi \mathbb{E}_{\mu_i} (q \lambda^a (\phi + x \lambda)^{-b})$ . Then, for  $a \leq 1$  and  $b \geq 0$ ,*

$$\frac{1}{\mathbb{E}_{\mu_2}[q]} (\mathcal{I}_{a,b}^\beta)_2 - \frac{1}{\mathbb{E}_{\mu_1}[q]} (\mathcal{I}_{a,b}^\beta)_1 \geq 0. \quad (\text{S16})$$

*Proof.* Note that  $h : \lambda \mapsto \phi \lambda^{a-1} (\phi + x \lambda)^{-b}$  is a nonincreasing function of  $\lambda \geq 0$ . Then, setting  $g = \lambda$  and  $f = gh$  in Lemma B.3 gives the desired result. □

**Lemma B.4.** *Suppose the functions  $f, g, h : \mathbb{R} \rightarrow \mathbb{R}$  are such that  $f(\lambda) = \lambda g(\lambda) h(\lambda)$  and  $h(\lambda)$  is nonincreasing for all  $\lambda > 0$ . Then, if the LJS  $\mu$  is aligned (see Definition 2.1), then  $\mathbb{E}_\lambda[g] \mathbb{E}_\mu[qf] \leq \mathbb{E}_\mu[qg] \mathbb{E}_\lambda[f]$ .*

*Proof.*

$$\mathbb{E}_\mu[qf] = \mathbb{E}_\mu[q\lambda gh] \quad (\text{S17})$$

$$= \mathbb{E}_\lambda[\mathbb{E}_\mu[q\lambda|\lambda]g(\lambda)h(\lambda)] \quad (\text{S18})$$

$$= \mathbb{E}_\mu[g]\mathbb{E}_\lambda\left[\mathbb{E}_\mu[q\lambda|\lambda]h(\lambda)\frac{g(\lambda)}{\mathbb{E}_\mu[g]}\right] \quad (\text{S19})$$

$$\leq \mathbb{E}_\mu[g]\mathbb{E}_\lambda\left[\mathbb{E}_\mu[q\lambda|\lambda]\frac{g(\lambda)}{\mathbb{E}_\mu[g]}\right]\mathbb{E}_\lambda\left[h(\lambda)\frac{g(\lambda)}{\mathbb{E}_\mu[g]}\right] \quad (\text{S20})$$

$$= \frac{1}{\mathbb{E}_\lambda[g]}\mathbb{E}_\mu[q\lambda g]\mathbb{E}_\lambda[f], \quad (\text{S21})$$

where  $\mathbb{E}_\mu[q\lambda|\lambda]$  is nondecreasing in  $\lambda$  because  $\mu$  is aligned, so the inequality again follows from the Harris inequality.  $\square$

**Corollary B.2.** If  $\mu$  is aligned,  $\mathcal{I}_{a,b}\mathcal{I}_{a,b}^\beta \leq \mathcal{I}_{a-1,b}\mathcal{I}_{a+1,b}^\beta$ .

*Proof.* Take  $g : \lambda \rightarrow \phi\lambda^a(\phi + x\lambda)^{-b}$  and  $h : \lambda \rightarrow 1/\lambda$  in Lemma B.4.  $\square$

## C WEIGHT-DATA ALIGNMENT IS A PARTIAL ORDER

We restate Definition 2.1 for reference, and prove that it defines a partial order. The definition and proof are identical to those of Tripuraneni et al. (2021a,b), but differ in notation so we repeat them here for clarity.

**Definition C.1** (Restatement of Definition 2.1). Let  $\mu_1$  and  $\mu_2$  be LJSs with the same marginal distribution of  $\lambda$ . If the asymptotic overlap coefficients are such that  $\mathbb{E}_{\mu_1}[\lambda q|\lambda]/\mathbb{E}_{\mu_2}[\lambda q|\lambda] = \mathbb{E}_{\mu_1}[q|\lambda]/\mathbb{E}_{\mu_2}[q|\lambda]$  is nondecreasing in  $\lambda$ , we say that  $\mu_1$  is more strongly aligned than  $\mu_2$  and write  $\mu_1 \leq \mu_2$ . Comparing against the case of isotropic weight distribution,  $\mu_\emptyset$ , we say  $\mu_1$  is aligned when  $\mu_1 \leq \mu_\emptyset$  and anti-aligned when  $\mu_1 \geq \mu_\emptyset$ .

**Proposition C.1.** Definition 2.1 is a partial order over weight-data alignments  $\mu$ .

*Proof.* Reflexivity is satisfied as  $\mathbb{E}_\mu[q|\lambda]/\mathbb{E}_\mu[q|\lambda] = 1$  is nondecreasing for all  $\mu$ .

For antisymmetry, we see  $\mu_1 \leq \mu_2$  and  $\mu_2 \leq \mu_1$  imply  $\mathbb{E}_{\mu_1}[q|\lambda]/\mathbb{E}_{\mu_2}[q|\lambda]$  is constant in  $\lambda$  as it is nonincreasing and nondecreasing. However, setting  $\mathbb{E}_{\mu_1}[q|\lambda] = c\mathbb{E}_{\mu_2}[q|\lambda]$  and taking expectation over  $\lambda$  and rearranging yields  $1 = \mathbb{E}_{\mu_1}[q]/\mathbb{E}_{\mu_2}[q] = c$ , so in fact  $\mathbb{E}_{\mu_1}[q|\lambda] = \mathbb{E}_{\mu_2}[q|\lambda]$ . Assuming that  $\mu_1$  and  $\mu_2$  are absolutely continuous (the case where they are a sum of point masses is similar), we can write their densities as  $p_i(\lambda, q) = p_i(\lambda)p_i(q|\lambda)$ . By assumption  $p_1(\lambda) = p_2(\lambda)$ , so it suffices to show  $p_1(q|\lambda) = p_2(q|\lambda)$  almost everywhere. Next note

$$0 = \mathbb{E}_{\mu_1}[q|\lambda] - \mathbb{E}_{\mu_2}[q|\lambda] = \int_{\mathbb{R}^+} q(p_1(q|\lambda) - p_2(q|\lambda))dq, \quad (\text{S22})$$

we have that  $p_1(q|\lambda) - p_2(q|\lambda) = 0$  almost everywhere.

Finally, for transitivity assume  $\mu_1 \leq \mu_2$  and  $\mu_2 \leq \mu_3$ , then

$$\frac{\mathbb{E}_{\mu_1}[q|\lambda]}{\mathbb{E}_{\mu_3}[q|\lambda]} = \frac{\mathbb{E}_{\mu_1}[q|\lambda]}{\mathbb{E}_{\mu_2}[q|\lambda]} \cdot \frac{\mathbb{E}_{\mu_2}[q|\lambda]}{\mathbb{E}_{\mu_3}[q|\lambda]}, \quad (\text{S23})$$

so  $\mathbb{E}_{\mu_1}[q|\lambda]/\mathbb{E}_{\mu_3}[q|\lambda]$  is the product of two nondecreasing, positive functions and is thus also nondecreasing.  $\square$

## D PROOFS OF PROPOSITIONS

### D.1 PROPOSITION 3.1

**Proposition D.1** (Restatement of Proposition 3.1). In the setting of Theorem 3.1, the bias  $B_\mu$  is a nonincreasing function of overparameterization ratio  $\phi/\psi$ .

*Proof.* Recall from Theorem 3.1 that the bias is given by

$$B_\mu = \phi \mathcal{I}_{1,2}^\beta, \quad (\text{S24})$$

where  $x$  is the unique positive real root of the self-consistent equation,

$$x = \frac{1 - \gamma \tau_1}{\omega + \mathcal{I}_{1,1}}. \quad (\text{S25})$$

Differentiating (S24) with respect to  $\phi/\psi$  gives,

$$\frac{\partial B_\mu}{\partial(\phi/\psi)} = -\frac{\psi^2}{\phi} \frac{\partial B_\mu}{\partial \psi} = 2\psi^2 \frac{\partial x}{\partial \psi} \mathcal{I}_{1,3}^\beta. \quad (\text{S26})$$

Since Lemma B.1 gives  $\mathcal{I}_{a,b}^\beta \geq 0$ , it suffices to show  $\frac{\partial x}{\partial \psi} \leq 0$ , which immediately follows by implicitly differentiating (S25) and simplifying the expression,

$$\frac{\partial x}{\partial \psi} = -\frac{\rho x \tau_1 (\omega + \mathcal{I}_{1,1})}{\phi (1 + \rho(\bar{\tau}_1 + \frac{\psi}{\phi} \tau_1)(\omega + \phi \mathcal{I}_{1,2}))} \leq 0, \quad (\text{S27})$$

where the inequality also follows from Lemma B.1. Therefore we conclude that  $\frac{\partial B_\mu}{\partial(\phi/\psi)} \leq 0$ .  $\square$

## D.2 PROPOSITION 3.2

**Proposition D.2** (Restatement of Proposition 3.2). *In the setting of Corollary G.1 and in the overparameterized regime ( $\psi < \phi$ ), the variance  $V_\mu$  is a nonincreasing function of overparameterization ratio  $\phi/\psi$ .*

*Proof.* In the overparameterized regime, Corollary G.1 gives the expression for the variance as,

$$V_\mu = \frac{\psi}{\phi - \psi} (\sigma_\varepsilon^2 + \mathcal{I}_{1,1}^\beta) + \frac{x \mathcal{I}_{2,2}}{\omega + \phi \mathcal{I}_{1,2}} (\sigma_\varepsilon^2 + \mathcal{I}_{1,2}^\beta), \quad (\text{S28})$$

and, since the self-consistent equation  $x = \frac{1}{\omega + \mathcal{I}_{1,1}}$  is independent of  $\psi$ , we have  $\frac{\partial x}{\partial \psi} = 0$  and,

$$\frac{\partial V_\mu}{\partial \psi} = \frac{\phi}{(\phi - \psi)^2} (\sigma_\varepsilon^2 + \mathcal{I}_{1,1}^\beta) \geq 0, \quad (\text{S29})$$

which implies that the variance is nonincreasing in the overparameterized regime.  $\square$

## D.3 PROPOSITION 3.3

**Proposition D.3** (Restatement of Proposition 3.3). *Let  $\mu_1, \mu_2$  be two LJSs such that  $\mu_1 \leq \mu_2$  (see Definition 2.1). Then  $B_{\mu_1} \leq B_{\mu_2}$ ,  $E_{\mu_1} \leq E_{\mu_2}$ , and  $B_{\mu_1}/V_{\mu_1} \leq B_{\mu_2}/V_{\mu_2}$ .*

*Proof.* For the bias, Corollary B.1 implies  $(\mathcal{I}_{1,2}^\beta)_1 \leq (\mathcal{I}_{1,2}^\beta)_2$  and therefore  $B_{\mu_1} \leq B_{\mu_2}$ .

For the test error, we use the explicit expression for the variance from Eq. (S378) and the identity  $\mathcal{I}_{2,2}^\beta = \frac{1}{x} \mathcal{I}_{1,1}^\beta - \frac{\phi}{x} \mathcal{I}_{1,2}^\beta$  which follows from Eq. (S9) to write,

$$E_\mu = C_0 + C_1 \mathcal{I}_{1,1}^\beta + C_2 \mathcal{I}_{1,2}^\beta, \quad (\text{S30})$$

where the  $C_i \geq 0$  and depend on  $\mu$  only through the marginal  $\lambda$  (i.e. they are independent of the weight distribution):

$$C_0 = -\rho \frac{\psi}{\phi} \frac{\partial x}{\partial \gamma} \sigma_\varepsilon^2 \left( (\omega + \phi \mathcal{I}_{1,2})(\omega + \mathcal{I}_{1,1}) + \frac{\phi}{\psi} \gamma \bar{\tau}_1 \mathcal{I}_{2,2} \right) \geq 0 \quad (\text{S31})$$

$$C_1 = -\rho \frac{\psi}{\phi} \frac{\partial x}{\partial \gamma} \left( (\omega + \phi \mathcal{I}_{1,2})(\omega + \mathcal{I}_{1,1}) + \frac{\gamma \tau_1}{x} (\omega + \phi \mathcal{I}_{1,2}) \right) \geq 0 \quad (\text{S32})$$

$$C_2 = \phi - \rho \frac{\psi}{\phi} \frac{\partial x}{\partial \gamma} \left( \frac{\phi^2}{\psi} \gamma \bar{\tau}_1 \mathcal{I}_{2,2} - \frac{\phi \gamma \tau_1}{x} (\omega + \phi \mathcal{I}_{1,2}) \right) \quad (\text{S33})$$

$$= -\rho \frac{\psi}{\phi} \frac{\partial x}{\partial \gamma} \left( \frac{\phi^2}{\psi} \gamma \bar{\tau}_1 \mathcal{I}_{2,2} - \frac{\phi \gamma \tau_1}{x} (\omega + \phi \mathcal{I}_{1,2}) - \frac{\phi^2}{\rho \psi \frac{\partial x}{\partial \gamma}} \right) \quad (\text{S34})$$

$$= -\rho \gamma \frac{\partial x}{\partial \gamma} \left( \phi \bar{\tau}_1 \mathcal{I}_{2,2} - \frac{\psi \tau_1}{x} (\omega + \phi \mathcal{I}_{1,2}) + \frac{\phi}{\rho x} (1 + \rho(\tau_1 \psi / \phi + \bar{\tau}_1)(\omega + \phi \mathcal{I}_{1,2})) \right) \quad (\text{S35})$$

$$= -\rho \gamma \frac{\partial x}{\partial \gamma} \left( \phi \bar{\tau}_1 \mathcal{I}_{2,2} + \frac{\phi}{\rho x} (1 + \rho \bar{\tau}_1 (\omega + \phi \mathcal{I}_{1,2})) \right) \quad (\text{S36})$$

$$\geq 0. \quad (\text{S37})$$

It is now straightforward to write,

$$E_{\mu_2} - E_{\mu_1} = C_1(\mathcal{I}_{1,1}^\beta)_2 + C_2(\mathcal{I}_{1,2}^\beta)_2 - C_1(\mathcal{I}_{1,1}^\beta)_1 + C_2(\mathcal{I}_{1,2}^\beta)_1 \quad (\text{S38})$$

$$= C_1((\mathcal{I}_{1,1}^\beta)_2 - (\mathcal{I}_{1,1}^\beta)_1) + C_2((\mathcal{I}_{1,2}^\beta)_2 - (\mathcal{I}_{1,2}^\beta)_1) \quad (\text{S39})$$

$$\geq 0, \quad (\text{S40})$$

where the inequality follows from Corollary B.1. Similarly, we can write,

$$\frac{B_{\mu_1}}{B_{\mu_2}} E_{\mu_2} - E_{\mu_1} = C_0 \frac{(\mathcal{I}_{1,2}^\beta)_1}{(\mathcal{I}_{1,2}^\beta)_2} + C_1 \frac{(\mathcal{I}_{1,2}^\beta)_1}{(\mathcal{I}_{1,2}^\beta)_2} (\mathcal{I}_{1,1}^\beta)_2 + C_2 (\mathcal{I}_{1,2}^\beta)_1 - C_0 - C_1 (\mathcal{I}_{1,1}^\beta)_1 - C_2 (\mathcal{I}_{1,2}^\beta)_1 \quad (\text{S41})$$

$$= C_0 \left( \frac{(\mathcal{I}_{1,2}^\beta)_1}{(\mathcal{I}_{1,2}^\beta)_2} - 1 \right) + C_1 \left( \frac{(\mathcal{I}_{1,2}^\beta)_1}{(\mathcal{I}_{1,2}^\beta)_2} (\mathcal{I}_{1,1}^\beta)_2 - (\mathcal{I}_{1,1}^\beta)_1 \right) \quad (\text{S42})$$

$$\leq 0, \quad (\text{S43})$$

where the inequality follows from Corollary B.1 and from Lemma B.3 with  $g : \lambda \rightarrow \phi \lambda (\phi + \lambda x)^{-1}$  and  $h : \lambda \rightarrow (\phi + \lambda x)^{-1}$ . Finally, using  $E_{\mu_i} = B_{\mu_i} + V_{\mu_i}$ , the above implies  $B_{\mu_1}/V_{\mu_1} \leq B_{\mu_2}/V_{\mu_2}$ .  $\square$

#### D.4 PROPOSITION 3.4

**Proposition D.4** (Restatement of Proposition 3.4). *If the LJS is aligned (see Definition 2.1), then, in the setting of Corollary G.1 the test error has at most two interior critical points as a function of the overparameterization ratio  $\phi/\psi$ .*

*Proof.* From Corollary G.1, there is a critical point at the interpolation threshold  $\phi/\psi = 1$ . Therefore it suffices to show that there is at most one additional interior critical point. Focusing first on the overparameterized regime  $\phi > \psi$ , the test error reads,

$$E_\mu = \phi \mathcal{I}_{1,2}^\beta + \frac{\psi}{\phi - \psi} (\sigma_\varepsilon^2 + \mathcal{I}_{1,1}^\beta) + \frac{x \mathcal{I}_{2,2}}{\omega + \phi \mathcal{I}_{1,2}} (\sigma_\varepsilon^2 + \mathcal{I}_{1,2}^\beta), \quad (\text{S44})$$

and, since  $\frac{\partial x}{\partial \psi} = 0$ ,

$$\frac{\partial E}{\partial \psi} = \frac{\phi}{(\phi - \psi)^2} (\sigma_\varepsilon^2 + \mathcal{I}_{1,1}^\beta) > 0, \quad (\text{S45})$$

which implies that the test error is monotone decreasing in the overparameterized regime.



Next, let us consider the case  $\phi < \psi$ . In this case,

$$E_\mu = \phi \mathcal{I}_{1,2}^\beta + \frac{\phi}{\psi - \phi} (\sigma_\varepsilon^2 + \mathcal{I}_{1,1}^\beta) + x \mathcal{I}_{2,2}^\beta, \quad (\text{S46})$$

so that,

$$\frac{\partial E_\mu}{\partial \psi} = \phi \frac{\partial x}{\partial \psi} \frac{\partial}{\partial x} \mathcal{I}_{1,2}^\beta - \frac{\phi}{(\psi - \phi)^2} (\sigma_\varepsilon^2 + \mathcal{I}_{1,1}^\beta) + \frac{\phi}{\psi - \phi} \frac{\partial x}{\partial \psi} \frac{\partial}{\partial x} \mathcal{I}_{1,1}^\beta + \frac{\partial x}{\partial \psi} \frac{\partial}{\partial x} (x \mathcal{I}_{2,2}^\beta) \quad (\text{S47})$$

$$= -\frac{\phi}{(\psi - \phi)^2} (\sigma_\varepsilon^2 + \mathcal{I}_{1,1}^\beta) + \frac{\partial x}{\partial \psi} \left( \phi \frac{\partial}{\partial x} \mathcal{I}_{1,2}^\beta + \frac{\phi}{\psi - \phi} \frac{\partial}{\partial x} \mathcal{I}_{1,1}^\beta + \frac{\partial}{\partial x} (x \mathcal{I}_{2,2}^\beta) \right) \quad (\text{S48})$$

$$= -\frac{\phi}{(\psi - \phi)^2} (\sigma_\varepsilon^2 + \mathcal{I}_{1,1}^\beta) + \frac{\partial x}{\partial \psi} \left( -2\phi \mathcal{I}_{2,3}^\beta - \frac{\phi}{\psi - \phi} \mathcal{I}_{2,2}^\beta + \mathcal{I}_{2,2}^\beta - 2x \mathcal{I}_{3,3}^\beta \right) \quad (\text{S49})$$

$$= -\frac{\phi}{(\psi - \phi)^2} (\sigma_\varepsilon^2 + \mathcal{I}_{1,1}^\beta) - \frac{\partial x}{\partial \psi} \frac{\psi}{\psi - \phi} \mathcal{I}_{2,2}^\beta \quad (\text{S50})$$

$$= -\frac{\phi}{(\psi - \phi)^2} (\sigma_\varepsilon^2 + \mathcal{I}_{1,1}^\beta) + \frac{\phi}{\psi(\psi - \phi)} \frac{\mathcal{I}_{2,2}^\beta}{\omega + \phi \mathcal{I}_{1,2}}. \quad (\text{S51})$$

Therefore we see that  $\frac{\partial E}{\partial \psi} = 0$  implies

$$\frac{\phi}{\psi} = x(\omega + \mathcal{I}_{1,1}) = 1 - (\omega + \phi \mathcal{I}_{1,2}) \frac{\sigma_\varepsilon^2 + \mathcal{I}_{1,1}^\beta}{\mathcal{I}_{2,2}^\beta}, \quad (\text{S52})$$

or, equivalently,  $g(x) = 0$  for

$$g(x) = 1 - (\omega + \phi \mathcal{I}_{1,2}) \frac{\sigma_\varepsilon^2 + \mathcal{I}_{1,1}^\beta}{\mathcal{I}_{2,2}^\beta} - x(\omega + \mathcal{I}_{1,1}). \quad (\text{S53})$$

First we note that  $g$  has at most one real root since its derivative is never positive,

$$g'(x) = 2\phi \mathcal{I}_{2,3} \frac{\sigma_\varepsilon^2 + \mathcal{I}_{1,1}^\beta}{\mathcal{I}_{2,2}^\beta} + (\omega + \phi \mathcal{I}_{1,2}) \left( 1 - 2 \frac{\sigma_\varepsilon^2 + \mathcal{I}_{1,1}^\beta}{\mathcal{I}_{3,3}^\beta} \right) - (\omega + \phi \mathcal{I}_{1,1}) + x \mathcal{I}_{2,2} \quad (\text{S54})$$

$$= 2\phi \mathcal{I}_{2,3} \frac{\sigma_\varepsilon^2 + \mathcal{I}_{1,1}^\beta}{\mathcal{I}_{2,2}^\beta} - 2(\omega + \phi \mathcal{I}_{1,2}) \frac{\sigma_\varepsilon^2 + \mathcal{I}_{1,1}^\beta}{\mathcal{I}_{3,3}^\beta} \quad (\text{S55})$$

$$= 2 \frac{\sigma_\varepsilon^2 + \mathcal{I}_{1,1}^\beta}{(\mathcal{I}_{2,2}^\beta)^2} \left( \phi \mathcal{I}_{2,3} \mathcal{I}_{2,2}^\beta - (\omega + \phi \mathcal{I}_{1,2}) \mathcal{I}_{3,3}^\beta \right) \quad (\text{S56})$$

$$= 2 \frac{\sigma_\varepsilon^2 + \mathcal{I}_{1,1}^\beta}{(\mathcal{I}_{2,2}^\beta)^2} \left( \phi^2 \mathcal{I}_{2,3} \mathcal{I}_{2,3}^\beta - (\omega + \phi \mathcal{I}_{1,2} - x \phi \mathcal{I}_{2,3}) \mathcal{I}_{3,3}^\beta \right) \quad (\text{S57})$$

$$= 2 \frac{\sigma_\varepsilon^2 + \mathcal{I}_{1,1}^\beta}{(\mathcal{I}_{2,2}^\beta)^2} \left( \phi^2 \mathcal{I}_{2,3} \mathcal{I}_{2,3}^\beta - (\omega + \phi^2 \mathcal{I}_{1,3}) \mathcal{I}_{3,3}^\beta \right) \quad (\text{S58})$$

$$\leq 2\phi^2 \frac{\sigma_\varepsilon^2 + \mathcal{I}_{1,1}^\beta}{(\mathcal{I}_{2,2}^\beta)^2} \left( \mathcal{I}_{2,3} \mathcal{I}_{2,3}^\beta - \mathcal{I}_{1,3} \mathcal{I}_{3,3}^\beta \right) \quad (\text{S59})$$

$$\leq 0, \quad (\text{S60})$$

where the last line follows from Corollary [B.2](#) since we are assuming  $\mu$  is aligned.

Next, regarding  $x$  as a function of  $\phi/\psi$ , we consider the interval  $(x_-, x_+)$  for  $x_- = x(\phi/\psi = 0)$  and  $x_+ = x(\phi/\psi = 1)$ . From the self-consistent equation for  $x$ , we immediately see that  $x_+(\omega + \mathcal{I}_{1,1}(x_+)) = 1$  and  $x_- = 0$  so that

$$g(x_+) = -(\omega + \phi \mathcal{I}_{1,2}) \frac{\sigma_\varepsilon^2 + \mathcal{I}_{1,1}^\beta}{\mathcal{I}_{2,2}^\beta} \quad (\text{S61})$$

$$< 0. \quad (\text{S62})$$

and

$$g(x_-) = 1 - (\omega + \phi^2 \mathbb{E}_\mu[\lambda]) \frac{\sigma_\varepsilon^2 + \mathbb{E}_\mu[q\lambda]}{\mathbb{E}_\mu[q\lambda^2]}. \quad (\text{S63})$$

Observe that,

$$g(x_-) > 0 \quad \Leftrightarrow \quad \sigma_\varepsilon^2 < \sigma_c^2 \equiv \frac{\mathbb{E}_\mu[q\lambda^2]}{\omega + \phi \mathbb{E}_\mu[\lambda]} - \mathbb{E}_\mu[q\lambda]. \quad (\text{S64})$$

Therefore, from the intermediate value theorem, we conclude that  $g$  has no real roots in  $(x_-, x_+)$  for  $\sigma_\varepsilon^2 > \sigma_c^2$ , and exactly one real root if  $\sigma_\varepsilon^2 < \sigma_c^2$ .  $\square$

## E LINEAR REGRESSION LIMIT

To reduce to the linear case, we need to take  $\psi \rightarrow 0$  and  $\sigma(x) \rightarrow x$ , in which case we have that  $\eta = \zeta = \rho \rightarrow 1$  and  $\omega \rightarrow 0$ , so that

$$\tau_1 \rightarrow x \quad \text{and} \quad \bar{\tau}_1 \rightarrow \frac{1}{\gamma}, \quad (\text{S65})$$

so that

$$\gamma = \frac{1}{x} - \mathcal{I}_{1,1} \quad (\text{S66})$$

$$= \frac{1}{x} - \phi \mathbb{E}_{s^2 \sim \mu_{\text{data}}} \frac{s^2}{\phi + xs^2}. \quad (\text{S67})$$

### E.1 COMPARISON TO MEL & GANGULI (2021)

To compare with (Mel & Ganguli, 2021), note that  $\phi = 1/\alpha$ ,  $\gamma = 1/\phi\lambda$ ,  $x = \tau_1 = \phi/\tilde{\lambda}$ , so we have

$$\lambda = \phi \left( \frac{\tilde{\lambda}}{\phi} - \phi \mathbb{E}_{s^2 \sim \mu_{\text{data}}} \frac{s^2 \tilde{\lambda}/\phi}{\tilde{\lambda} + s^2} \right) \quad (\text{S68})$$

$$= \tilde{\lambda} - \phi \mathbb{E}_{s^2 \sim \mu_{\text{data}}} \frac{s^2 \tilde{\lambda}}{\tilde{\lambda} + s^2}, \quad (\text{S69})$$

which is the expression appearing in Eq. (8) in (Mel & Ganguli, 2021). To compare expressions for the test error, note that

$$\frac{\partial x}{\partial \gamma} \rightarrow -\frac{x}{\gamma + \phi \mathcal{I}_{1,2}}, \quad (\text{S70})$$

and so,

$$\rho_f = \frac{\partial \tilde{\lambda}}{\partial \lambda} \quad (\text{S71})$$

$$= \frac{\partial \phi/x}{\partial \phi \gamma} \quad (\text{S72})$$

$$= -\frac{1}{x^2} \frac{\partial x}{\partial \gamma} \quad (\text{S73})$$

$$= \frac{1}{x(\gamma + \phi \mathcal{I}_{1,2})}, \quad (\text{S74})$$

so that,

$$E = \phi \mathcal{I}_{1,2}^\beta + \frac{1}{\rho_f} \left( \phi \mathcal{I}_{1,2}^\beta + \sigma_\varepsilon^2 \right) x^2 \mathcal{I}_{2,2} \quad (\text{S75})$$

$$= \phi \mathcal{I}_{1,2}^\beta + \frac{1}{\rho_f} \phi \mathcal{I}_{1,2}^\beta (x I_{1,1} - x \phi \mathcal{I}_{1,2}) + \frac{\sigma_\varepsilon^2}{\rho_f} x^2 \mathcal{I}_{2,2} \quad (\text{S76})$$

$$= \phi \mathcal{I}_{1,2}^\beta + \frac{1}{\rho_f} \phi \mathcal{I}_{1,2}^\beta (1 - x(\gamma + \phi \mathcal{I}_{1,2})) + \frac{\sigma_\varepsilon^2}{\rho_f} x^2 \mathcal{I}_{2,2} \quad (\text{S77})$$

$$= \phi \mathcal{I}_{1,2}^\beta + \frac{1}{\rho_f} \phi \mathcal{I}_{1,2}^\beta (1 - \rho_f) + \frac{\sigma_\varepsilon^2}{\rho_f} x^2 \mathcal{I}_{2,2} \quad (\text{S78})$$

$$= \frac{1}{\rho_f} \left( \phi \mathcal{I}_{1,2}^\beta + \sigma_\varepsilon^2 x^2 \mathcal{I}_{2,2} \right). \quad (\text{S79})$$

In contrast to our conventions, the error  $\mathcal{F}$  in (Mel & Ganguli, 2021) does include an additive constant induced by the label noise, and also normalizes by the total output variance i.e.  $\mathcal{F} = \frac{E + \sigma_\varepsilon^2}{\text{Var}[y]}$ . Taking this relation into account and using the definitions of  $\mathcal{I}$  and  $\mathcal{I}^\beta$ , and finally translating the notation via the substitutions  $\phi \rightarrow 1/\alpha$ ,  $\lambda q \rightarrow \mathbf{v} = (\mathbf{S}\mathbf{U}^T \mathbf{w})^2$ ,  $\frac{\sigma_\varepsilon^2}{\text{Var}[y]} \rightarrow f_n$ ,  $\frac{|\mathbf{v}|^2}{\text{Var}[y]} \rightarrow f_s$ , we find

$$\mathcal{F} = \frac{E + \sigma_\varepsilon^2}{\text{Var}[y]} \quad (\text{S80})$$

$$= \frac{\sigma_\varepsilon^2}{\text{Var}[y]} + \frac{1}{\rho_f} \left( \frac{1}{\text{Var}[y]} \mathbb{E}_\mu \left[ q \lambda \left( \frac{\tilde{\lambda}}{\tilde{\lambda} + \lambda} \right)^2 \right] + \phi \frac{\sigma_\varepsilon^2}{\text{Var}[y]} \mathbb{E}_\mu \left[ \left( \frac{\lambda}{\tilde{\lambda} + \lambda} \right)^2 \right] \right) \quad (\text{S81})$$

$$= f_n + \frac{1}{\rho_f} \left( f_s \mathbb{E}_\mu \left[ \hat{\mathbf{v}}^2 \left( \frac{\tilde{\lambda}}{\tilde{\lambda} + \lambda} \right)^2 \right] + f_n \frac{1}{\alpha} \mathbb{E}_\mu \left[ \left( \frac{\lambda}{\tilde{\lambda} + \lambda} \right)^2 \right] \right) \quad (\text{S82})$$

which is Eq. (6) of (Mel & Ganguli, 2021).

## E.2 COMPARISON TO (Wu & Xu (2020))

(Wu & Xu (2020)) study the case of anisotropic regularizer:

$$\hat{\beta}_\lambda = (X^\top X + \lambda \Sigma_w)^{-1} X^\top y \quad (\text{S83})$$

with  $n$  samples,  $p$  features,  $X \in \mathbb{R}^{n \times p}$  and  $p/n \rightarrow \gamma$ . After simplifying the error expression they arrive at eq. 3.1:

$$\mathbb{E} \left( \hat{y} - \tilde{x}^\top \hat{\beta}_\lambda \right)^2 = \tilde{\sigma}^2 \left( 1 + \frac{1}{n} \text{tr} \left( \Sigma_{x/w} \left( X_{/w}^\top X_{/w} + \lambda I \right)^{-1} - \lambda \Sigma_{x/w} \left( X_{/w}^\top X_{/w} + \lambda I \right)^{-2} \right) \right) \quad (\text{S84})$$

$$+ \frac{\lambda^2}{n} \text{tr} \left( \Sigma_{x/w} \left( X_{/w}^\top X_{/w} + \lambda I \right)^{-1} \Sigma_{w\beta} \left( X_{/w}^\top X_{/w} + \lambda I \right)^{-1} \right) \quad (\text{S85})$$

Setting  $\Sigma_w \rightarrow I$  must give the expression for isotropic regularization, thus the effect of the weighting matrix  $\Sigma_w$  can be accounted for by just changing the parameters of the isotropic model. The effective feature covariance is  $\Sigma \rightarrow \Sigma_{x/w}$  and the effective weight covariance is  $\Sigma_\beta \rightarrow \Sigma_{w\beta}$ .

The error expression given in eqs. 4.1-4.3 is

$$\mathbb{E} \left[ \left( \tilde{y} - \tilde{x}^\top \hat{\beta}_\lambda \right)^2 \right] \rightarrow \frac{m'(-\lambda)}{m^2(-\lambda)} \cdot \left( \gamma \mathbb{E} \frac{gh}{(h \cdot m(-\lambda) + 1)^2} + \tilde{\sigma}^2 \right) \quad (\text{S86})$$

where

$$\lambda = \frac{1}{m(-\lambda)} - \gamma \mathbb{E} \frac{h}{1 + h \cdot m(-\lambda)} \quad (\text{S87})$$

$$1 = \left( \frac{1}{m^2(-\lambda)} - \gamma \mathbb{E} \frac{h^2}{(h \cdot m(-\lambda) + 1)^2} \right) m'(-\lambda) \quad (\text{S88})$$

In our notation, the predicted output on a new input  $x$  is

$$\hat{y} = \left( \frac{1}{\sqrt{n_0}} \beta^\top X + \epsilon_{tr} \right) \left( \frac{1}{n_1} F^\top F + \gamma I_m \right)^{-1} \left( \frac{1}{n_1} F^\top f(x) \right) \quad (\text{S89})$$

$$\rightarrow \left( \frac{1}{\sqrt{n_0}} \beta^\top X + \epsilon_{tr} \right) \left( \frac{1}{n_0} X^\top X + \gamma I_m \right)^{-1} \frac{1}{n_0} X^\top x \quad (\text{S90})$$

$$= \left( \frac{1}{\sqrt{n_0}} \beta^\top X + \epsilon_{tr} \right) X^\top \left( \frac{1}{n_0} X X^\top + \gamma I_{n_0} \right)^{-1} \frac{1}{n_0} x \quad (\text{S91})$$

$$= \hat{y}^\top \tilde{X}^\top \left( \tilde{X} \tilde{X}^\top + \phi \gamma I_{n_0} \right)^{-1} \tilde{x} \quad (\text{S92})$$

where  $\tilde{X}$  has  $\frac{1}{\sqrt{m}} = \frac{1}{\sqrt{\text{samples}}}$  normalization. Thus translating our notation involves setting  $\phi \rightarrow \gamma$ ,  $\gamma \rightarrow \lambda/\gamma$ ,  $\Sigma \rightarrow \Sigma_{x/w}$ ,  $\lambda \rightarrow h$ ,  $\Sigma_\beta \rightarrow \gamma \Sigma_{w\beta}$ , and  $q \rightarrow \gamma g$ . In this new notation, our equation for  $x$  reads

$$\lambda = \frac{\gamma}{x} - \gamma \mathbb{E} \frac{h}{1 + h \cdot \left( \frac{x}{\gamma} \right)} \quad (\text{S93})$$

which shows  $x \rightarrow \gamma m(-\lambda)$ , and therefore  $\frac{\partial x}{\partial \gamma} \rightarrow \frac{\partial \gamma m(-\lambda)}{\partial \lambda / \gamma} = -\gamma^2 m'(-\lambda)$ . Next, note that

$$-\frac{\partial x}{\partial \gamma} \mathcal{I}_{2,2} = \frac{x}{\gamma + \phi \mathcal{I}_{1,2}} \mathcal{I}_{2,2} \quad (\text{S94})$$

$$= \frac{\mathcal{I}_{1,1} - \phi \mathcal{I}_{1,2}}{\gamma + \phi \mathcal{I}_{1,2}} \quad (\text{S95})$$

$$= \frac{\mathcal{I}_{1,1} + \gamma}{\gamma + \phi \mathcal{I}_{1,2}} - 1 \quad (\text{S96})$$

$$= \frac{1/x}{\gamma + \phi \mathcal{I}_{1,2}} - 1 \quad (\text{S97})$$

$$= -\frac{1}{x^2} \frac{\partial x}{\partial \gamma} - 1 \quad (\text{S98})$$

So the full error is

$$E = \phi \mathcal{I}_{1,2}^\beta - \frac{\partial x}{\partial \gamma} \left( \phi \mathcal{I}_{1,2}^\beta \mathcal{I}_{2,2} + \sigma_e^2 \mathcal{I}_{2,2} \right) \quad (\text{S99})$$

$$= \phi \left( 1 - \frac{\partial x}{\partial \gamma} \mathcal{I}_{2,2} \right) \mathcal{I}_{1,2}^\beta - \sigma_e^2 \frac{\partial x}{\partial \gamma} \mathcal{I}_{2,2} \quad (\text{S100})$$

$$= \left( -\frac{1}{x^2} \frac{\partial x}{\partial \gamma} \right) \phi \mathcal{I}_{1,2}^\beta + \sigma_e^2 \left( -\frac{1}{x^2} \frac{\partial x}{\partial \gamma} - 1 \right) \quad (\text{S101})$$

$$= \left( -\frac{1}{x^2} \frac{\partial x}{\partial \gamma} \right) \left( \phi \mathcal{I}_{1,2}^\beta + \sigma_e^2 \right) - \sigma_e^2 \quad (\text{S102})$$

$$\rightarrow \frac{m'(-\lambda)}{m^2(-\lambda)} \left( \gamma \mathbb{E} \frac{hg}{(1 + m(-\lambda)h)^2} + \tilde{\sigma}^2 \right) - \tilde{\sigma}^2 \quad (\text{S103})$$

which, after removing the additive shift, matches the expressions given in (Wu & Xu, 2020) eq. 4.1.

## F STRUCTURED LEARNING CURVES

### F.1 EFFECT OF SPECTRAL GAP

Here we demonstrate that a large gap in the spectrum of  $\Sigma$  can induce steep cliffs in the learning curves as a function of the overparameterization  $\phi/\psi$ :

Suppose there is a gap in the spectrum of  $\Sigma$  of size  $g$ . That is, there are  $\lambda_- < \lambda_+$  such that there is no eigenvalue  $\lambda \in (\lambda_-, \lambda_+)$  and  $\frac{\lambda_+}{\lambda_-} = g$ . Assuming  $\phi < 1$  and  $\mu$  is aligned, and working in the

noiseless ridgeless limit, we will show the slope of the learning curve  $\frac{\partial \log E_\mu}{\partial (\phi/\psi)}$  becomes arbitrarily negative for small  $\omega$ .

From Theorem (3.1),  $x, \tau_1$  satisfy

$$x = \frac{1 - \gamma\tau_1}{\omega + \phi \mathbb{E} \frac{\lambda}{\phi + x\lambda}} \quad (\text{S104})$$

$$\tau_1 = \frac{\sqrt{(\psi - \phi)^2 + 4x\psi\phi\gamma/\rho} + \psi - \phi}{2\psi\gamma} \quad (\text{S105})$$

Since  $x \leq \frac{\min\{1, \phi/\psi\}}{\omega}$  (Eq. (S8)), for  $\omega > 0$ ,  $x$  stays finite in the ridgeless limit  $\gamma \rightarrow 0$ , so

$$\gamma\tau_1 \rightarrow \frac{|\psi - \phi| + \psi - \phi}{2\psi}. \quad (\text{S106})$$

We have the numerator  $1 - \gamma\tau_1 \rightarrow \min(1, \phi/\psi)$ , and

$$x \left( \omega + \phi \mathbb{E} \frac{\lambda}{\phi + x\lambda} \right) = \min \left( 1, \frac{\phi}{\psi} \right). \quad (\text{S107})$$

Since  $x = 0$  is not a solution for  $0 < \psi, \phi < \infty$ , we can change variables to  $\tilde{\gamma} = \frac{\phi}{x}$ , giving

$$\omega \frac{1}{\tilde{\gamma}} + \mathbb{E} \frac{\lambda}{\tilde{\gamma} + \lambda} = \frac{1}{\phi} \min \left( 1, \frac{\phi}{\psi} \right) \quad (\text{S108})$$

which implies  $\tilde{\gamma}$  is a continuous decreasing function of  $\phi/\psi$  (keeping  $\phi$  fixed). Taking the limit of (S108) directly shows that  $\tilde{\gamma}_{\max} := \lim_{\phi/\psi \rightarrow 0} \tilde{\gamma} = \infty$ , while  $\tilde{\gamma}_{\min} := \lim_{\phi/\psi \rightarrow \infty} \tilde{\gamma}$  satisfies

$$\omega \frac{1}{\tilde{\gamma}_{\min}} + \mathbb{E} \frac{\lambda}{\tilde{\gamma}_{\min} + \lambda} = \frac{1}{\phi} \quad (\text{S109})$$

By the intermediate value theorem,  $\tilde{\gamma}$  takes all values in the interval  $(\tilde{\gamma}_{\min}, \infty)$ . For  $\phi < 1$ , using  $\mathbb{E} \frac{\lambda}{\tilde{\gamma}_{\min} + \lambda} \leq 1$  we obtain  $\tilde{\gamma}_{\min} \leq \omega \frac{\phi}{1 - \phi}$ .

We assume that  $\omega \frac{\phi}{1 - \phi} \leq \lambda_-$ , so the previous bound gives  $\tilde{\gamma}_{\min} \leq \lambda_-$  and thus  $\tilde{\gamma}$  attains all values in  $(\lambda_-, \lambda_+)$ . In particular, there is some  $0 < \phi/\psi < 1$  such that  $\tilde{\gamma}(\phi/\psi) = \sqrt{\lambda_- \lambda_+}$ . At this point, differentiating (S108) gives

$$-\tilde{\gamma} \frac{\partial}{\partial \tilde{\gamma}} \frac{1}{\psi} = \omega \frac{1}{\tilde{\gamma}} + \tilde{\gamma} \mathbb{E} \frac{\lambda}{(\tilde{\gamma} + \lambda)^2} \quad (\text{S110})$$

$$\leq \omega \frac{1}{\tilde{\gamma}} + \tilde{\gamma} \left( \frac{\lambda_+}{(\tilde{\gamma} + \lambda_+)^2} p(\lambda \geq \lambda_+) + \frac{\lambda_-}{(\tilde{\gamma} + \lambda_-)^2} p(\lambda \leq \lambda_-) \right) \quad (\text{S111})$$

$$= \omega \frac{1}{\tilde{\gamma}} + \frac{\sqrt{g}}{(\sqrt{g} + 1)^2} \quad (\text{S112})$$

Since  $-\tilde{\gamma} \frac{\partial}{\partial \tilde{\gamma}} \frac{1}{\psi} = \frac{1}{\phi} \left( \frac{\partial \log x}{\partial (\phi/\psi)} \right)^{-1}$ , we get

$$\frac{1}{\phi} \frac{1}{\omega \frac{1}{\tilde{\gamma}} + \frac{\sqrt{g}}{(\sqrt{g} + 1)^2}} \leq \frac{\partial \log x}{\partial (\phi/\psi)} \quad (\text{S113})$$

For large spectral gap  $g$  this tends toward

$$\frac{1}{\phi} \frac{\sqrt{\lambda_+ \lambda_-}}{\omega} \leq \frac{\partial \log x}{\partial (\phi/\psi)} \quad (\text{S114})$$

If the nonlinearity  $\omega$  is small compared to the middle of the spectral gap  $\sqrt{\lambda_+ \lambda_-}$ ,  $x$  undergoes large fractional change as a function of the overparameterization ratio  $\phi/\psi$ .

To see how this affects the test error, we can use the lowering identity  $\mathcal{I}_{a-1,b-1}^\beta = \phi \mathcal{I}_{a-1,b}^\beta + x \mathcal{I}_{a,b}^\beta$  to write the ridgeless error expression from Eq. (S46) as

$$E_\mu = \phi \mathcal{I}_{1,2}^\beta + \frac{\phi}{\psi - \phi} \left( \sigma_\epsilon^2 + \mathcal{I}_{1,1}^\beta \right) + x \mathcal{I}_{2,2}^\beta \quad (\text{S115})$$

$$= \frac{\phi}{\psi - \phi} \sigma_\epsilon^2 + \frac{\psi}{\psi - \phi} \mathcal{I}_{1,1}^\beta. \quad (\text{S116})$$

So we can write

$$\frac{\partial}{\partial(\phi/\psi)} \log \left( E_\mu - \frac{\phi}{\psi - \phi} \sigma_\epsilon^2 \right) = \frac{\partial}{\partial(\phi/\psi)} \log \frac{\psi}{\psi - \phi} \mathcal{I}_{1,1}^\beta \quad (\text{S117})$$

$$= \frac{\psi}{\psi - \phi} + \frac{\partial}{\partial(\phi/\psi)} \log \mathcal{I}_{1,1}^\beta \quad (\text{S118})$$

For general  $a, b$ , we have

$$\frac{\partial}{\partial(\phi/\psi)} \log \mathcal{I}_{a,b}^\beta = -b \left( \frac{\partial \log x}{\partial(\phi/\psi)} \right) \frac{\mathbb{E} \left[ \frac{\lambda^{a+1}}{(\bar{\gamma} + \lambda)^{b+1}} q \right]}{\mathbb{E} \left[ \frac{\lambda^a}{(\bar{\gamma} + \lambda)^b} q \right]} \quad (\text{S119})$$

Specializing to  $a = b = 1$ , and using the fact that  $\frac{\lambda}{\bar{\gamma} + \lambda} \mathbb{E}_q [q|\lambda]$  is a nondecreasing function of  $\lambda$  (guaranteed since  $q$  is aligned), we may apply the Harris inequality to obtain

$$-\frac{\partial}{\partial \psi} \log \mathcal{I}_{1,1}^\beta = \left( \frac{\partial \log x}{\partial(\phi/\psi)} \right) \frac{\mathbb{E}_\lambda \left[ \frac{\lambda}{\bar{\gamma} + \lambda} \left( \frac{\lambda}{\bar{\gamma} + \lambda} \mathbb{E}_q [q|\lambda] \right) \right]}{\mathbb{E}_\lambda \left[ \left( \frac{\lambda}{\bar{\gamma} + \lambda} \right) \mathbb{E}_q [q|\lambda] \right]} \quad (\text{S120})$$

$$\geq \left( \frac{\partial \log x}{\partial(\phi/\psi)} \right) \mathbb{E}_\lambda \left[ \frac{\lambda}{\bar{\gamma} + \lambda} \right] \quad (\text{S121})$$

$$\xrightarrow{g \rightarrow \infty} \left( \frac{\partial \log x}{\partial(\phi/\psi)} \right) p(\lambda > \lambda_+) \quad (\text{S122})$$

$$\geq \frac{1}{\phi} \frac{\sqrt{\lambda_+ \lambda_-}}{\omega} p(\lambda > \lambda_+), \quad (\text{S123})$$

which implies

$$-\frac{\partial}{\partial(\phi/\psi)} \log \left( E_\mu - \frac{\phi}{\psi - \phi} \sigma_\epsilon^2 \right) = -\frac{\psi}{\psi - \phi} - \frac{\partial}{\partial(\phi/\psi)} \log \mathcal{I}_{1,1}^\beta \quad (\text{S124})$$

$$\geq -\frac{\psi}{\psi - \phi} + \frac{1}{\phi} \frac{\sqrt{\lambda_+ \lambda_-}}{\omega} p(\lambda > \lambda_+) \quad (\text{S125})$$

In particular, if  $\sigma_\epsilon^2 = 0$ , then

$$-\frac{\partial \log E_\mu}{\partial(\phi/\psi)} \geq -\frac{\psi}{\psi - \phi} + \frac{1}{\phi} \frac{\sqrt{\lambda_+ \lambda_-}}{\omega} p(\lambda > \lambda_+) \quad (\text{S126})$$

Thus as  $\omega \rightarrow 0$  the learning curve becomes arbitrarily steep at the critical value  $x = \phi/\sqrt{\lambda_+ \lambda_-}$ .

## F.2 ANALYSIS OF THE D-SCALE MODEL IN THE SEPARATED LIMIT

We will consider the  $d$ -scale covariance model:

$$\lambda_n = C \alpha^n, \quad p_n = \frac{1}{d}, \quad n = 0, 1, \dots, d-1 \quad (\text{S127})$$

where  $C$  is chosen so that

$$1 = s = \bar{\text{tr}}[\Sigma] = \frac{1}{d} \sum_{n=0}^{d-1} C \alpha^n = C \frac{1}{d} \frac{1 - \alpha^d}{1 - \alpha} \quad (\text{S128})$$

We will obtain expressions for  $x$  in the limit of small  $\lambda$ . Consider the ridgeless limit of  $\tilde{\gamma} := \phi/x$ :

$$\frac{1}{\tilde{\gamma}}\omega + \sum_n p_n \frac{\lambda_n}{\tilde{\gamma} + \lambda_n} = \frac{1}{\max(\phi, \psi)} \quad (\text{S129})$$

Suppose,  $\omega$  sits between the scales  $C\alpha^j, C\alpha^{j+1}$ . To enforce this constraint, we will take  $\omega = \hat{\omega}\alpha^{j+\frac{1}{2}}$  where  $\hat{\omega}$  is a constant independent of  $\alpha$ .

The  $\alpha$  scaling of  $\tilde{\gamma}$  will depend on the value of  $\max(\phi, \psi)$ . Discarding the second term in (S129) we obtain  $\max(\phi, \psi)\omega \leq \tilde{\gamma}$ , and thus the lowest possible scaling for  $\tilde{\gamma}$  is  $\tilde{\gamma} = C_{j+\frac{1}{2}}\alpha^{j+\frac{1}{2}}$ . Substituting this ansatz into (S129) and taking the limit  $\alpha \rightarrow 0$ , we obtain

$$\frac{1}{\max(\phi, \psi)} = \frac{1}{\tilde{\gamma}}\omega + \frac{1}{d} \sum_n \frac{C\alpha^n}{C_{j+\frac{1}{2}}\alpha^{j+\frac{1}{2}} + C\alpha^n} \quad (\text{S130})$$

$$\xrightarrow{\alpha \rightarrow 0} \frac{1}{\tilde{\gamma}}\omega + \frac{j+1}{d} \quad (\text{S131})$$

Solving for  $\tilde{\gamma}$  gives  $\tilde{\gamma} = \frac{\max(\phi, \psi)}{1 - \max(\phi, \psi)\frac{j+1}{d}}\omega$ . For other values of  $\max(\phi, \psi)$ ,  $\tilde{\gamma}$  may have higher scaling, ie.  $\tilde{\gamma} = C_k\alpha^k$  with  $k \leq j$ . Substituting and solving for  $\tilde{\gamma}$  we obtain  $\tilde{\gamma} = \frac{\max(\phi, \psi)\frac{k+1}{d}-1}{1 - \max(\phi, \psi)\frac{k}{d}}\lambda_k$ . Thus we obtain the following self-consistent solutions for  $\tilde{\gamma}$ :

$$\tilde{\gamma} = \begin{cases} \frac{\max(\phi, \psi)}{1 - \max(\phi, \psi)\frac{j+1}{d}}\omega & \max(\phi, \psi) < \frac{d}{j+1} \\ \frac{\max(\phi, \psi)\frac{k+1}{d}-1}{1 - \max(\phi, \psi)\frac{k}{d}}\lambda_k & \frac{d}{k+1} < \max(\phi, \psi) < \frac{d}{k} \end{cases} \quad (\text{S132})$$

Thus  $\tilde{\gamma}$  takes on the scale of a single eigenvalue  $\lambda_k$  for a range of overparameterization ratios corresponding to  $\frac{d}{k+1} < \psi \max\left(\frac{\phi}{\psi}, 1\right) < \frac{d}{k}$ . To understand what happens at the transitions between these regimes, we can apply the results from the previous subsection F.1 for generic  $\Sigma$  with large spectral gap. In the notation of F.1, the  $D$ -scale model has a spectral gap between each pair of consecutive scales of size  $g = \lambda_j/\lambda_{j+1} = C\alpha^j/C\alpha^{j+1} = 1/\alpha$  and as a consequence,  $\tilde{\gamma}$  will exhibit near infinite slop as it passes through the middle of a gap  $\sqrt{\lambda_{j+1}\lambda_j} = C\alpha^{j+\frac{1}{2}}$ . Comparing to the self-consistent solutions (S132) these transitions must happen at the critical values  $\max(\phi, \psi) = \frac{d}{k+1}$  for  $k \leq j$ . At these transition points, the error exhibits steep cliffs in the parameter regime described in F.1

## G PROOF OF THEOREM 3.1

The proof closely follows the methods described in (Adlam et al., 2019; Adlam & Pennington 2020a,b; Tripuraneni et al., 2021a,b). Indeed, precisely the same techniques from operator-valued free probability used in those works apply here. The main and only difference is the anisotropic weight covariance  $\Sigma_\beta$ , which changes the details of the computations but not the arguments justifying the linearized Gaussian equivalents and the application of operator-valued free probability. We therefore refer the reader to those previous works for an in-depth discussion of methods and merely focus here on the details of the requisite calculations. Throughout this section, we use  $\text{tr}$  to denote the dimension-normalized trace, i.e.  $\text{tr}(A) = \frac{1}{n}\text{tr}(A)$  for a matrix  $A \in \mathbb{R}^{n \times n}$ .

### G.1 DECOMPOSITION OF THE TEST LOSS

The test loss can be written as,

$$E_{\Sigma^*} = \mathbb{E}_{(\mathbf{x}, y)} (y - \hat{y}(\mathbf{x}))^2 = E_1 + E_2 + E_3 \quad (\text{S133})$$

with

$$E_1 = \mathbb{E}_{(\mathbf{x}, \varepsilon)} \text{tr}(y(\mathbf{x})y(\mathbf{x})^\top) \quad (\text{S134})$$

$$E_2 = -2\mathbb{E}_{(\mathbf{x}, \varepsilon)} \text{tr}(K_\mathbf{x}^\top K^{-1}Y^\top y(\mathbf{x})) \quad (\text{S135})$$

$$E_3 = \mathbb{E}_{(\mathbf{x}, \varepsilon)} \text{tr}(K_\mathbf{x}^\top K^{-1}Y^\top Y K^{-1}K_\mathbf{x}). \quad (\text{S136})$$

Recall the kernels  $K = K(X, X)$  and  $K_{\mathbf{x}} = K(X, \mathbf{x})$  are given by,

$$K = \frac{F^\top F}{n_1} + \gamma I_m \quad \text{and} \quad K_{\mathbf{x}} = \frac{1}{n_1} F^\top f. \quad (\text{S137})$$

Using the cyclicity and linearity of the trace, the expectation over  $\mathbf{x}$  requires the computation of

$$\mathbb{E}_{\mathbf{x}} K_{\mathbf{x}} K_{\mathbf{x}}^\top, \quad \mathbb{E}_{\mathbf{x}} y(\mathbf{x}) K_{\mathbf{x}}^\top, \quad \mathbb{E}_{\mathbf{x}} y(\mathbf{x}) y(\mathbf{x})^\top. \quad (\text{S138})$$

As described in detail in (Tripuraneni et al., 2021a,b; Adlam et al., 2019; Adlam & Pennington, 2020a; Mei & Montanari, 2019), asymptotically the trace terms  $E_1$ ,  $E_2$ , and  $E_3$  are invariant to a linearization of the random feature vector  $f$ ,

$$f \rightarrow f^{\text{lin}} = \frac{\sqrt{\rho}}{\sqrt{n_0}} W \mathbf{x} + \sqrt{\eta - \zeta} \theta, \quad (\text{S139})$$

where  $\theta \in \mathbb{R}^{n_1}$  is a vector of iid standard normal variates. Similarly, we will take the linearization of the training features to be  $\frac{\sqrt{\rho}}{\sqrt{n_0}} W X + \sqrt{\eta - \zeta} \Theta$  where  $\Theta \in \mathbb{R}^{n_1 \times m}$  has standard normal components. The expectations over  $\mathbf{x}$  are now trivial and we readily find,

$$\mathbb{E}_{\mathbf{x}} K_{\mathbf{x}} K_{\mathbf{x}}^\top = \frac{1}{n_1^2} F^\top \left( \frac{\rho}{n_0} W \Sigma W^\top + (\eta - \zeta) I_{n_1} \right) F \quad (\text{S140})$$

$$\mathbb{E}_{\mathbf{x}} y(\mathbf{x}) K_{\mathbf{x}}^\top = \frac{\sqrt{\rho}}{n_0 n_1} \beta^\top \Sigma W^\top F \quad (\text{S141})$$

$$\mathbb{E}_{\mathbf{x}} y(\mathbf{x}) y(\mathbf{x})^\top = \frac{1}{n_0} \beta \Sigma \beta^\top \quad (\text{S142})$$

Next, we recall the definition,  $Y = \beta^\top X / \sqrt{n_0} + \epsilon$ , and, using the above substitution, we find

$$\mathbb{E}_{\epsilon} [Y^\top Y] = \frac{1}{n_0} X^\top \Sigma_{\beta} X + \sigma_{\epsilon}^2 I_m \quad (\text{S143})$$

$$\mathbb{E}_{\epsilon} [Y^\top \mathbb{E}_{\mathbf{x}} y(\mathbf{x}) K_{\mathbf{x}}^\top] = \frac{\sqrt{\rho}}{n_0^{3/2} n_1} X^\top \Sigma_{\beta} \Sigma W^\top F. \quad (\text{S144})$$

Putting these pieces together, we have

$$E_1 = \frac{\text{tr}(\Sigma_{\beta} \Sigma)}{n_0} \quad (\text{S145})$$

$$E_2 = E_{21} \quad (\text{S146})$$

$$E_3 = E_{31} + E_{32}, \quad (\text{S147})$$

where,

$$E_{21} = -2 \frac{\sqrt{\rho}}{n_0^{3/2} n_1} \mathbb{E} \text{tr} (X^\top \Sigma_{\beta} \Sigma W^\top F K^{-1}) \quad (\text{S148})$$

$$E_{31} = \sigma_{\epsilon}^2 \mathbb{E} \text{tr} (K^{-1} \Sigma_3 K^{-1}) \quad (\text{S149})$$

$$E_{32} = \frac{1}{n_0} \mathbb{E} \text{tr} (K^{-1} \Sigma_3 K^{-1} X^\top \Sigma_{\beta} X) \quad (\text{S150})$$

and,

$$\Sigma_3 = \frac{\rho}{n_0 n_1^2} F^\top W \Sigma W^\top F + \frac{\eta - \zeta}{n_1^2} F^\top F. \quad (\text{S151})$$

## G.2 DECOMPOSITION OF THE BIAS AND TOTAL VARIANCE

Note that it is sufficient to calculate the bias term given the total test loss, since the total variance can be obtained as  $V_{\Sigma} = E_{\Sigma} - B_{\Sigma}$ . Following the total multivariate bias-variance decomposition



of (Adlam & Pennington, 2020b), for each random variable in question we introduce an iid copy of it denoted by either the subscript 1 or 2. We can then write,

$$B_\Sigma = \mathbb{E}_{(\mathbf{x}, y)} (y - \mathbb{E}_{(W, X, \varepsilon)} \hat{y}(\mathbf{x}; W, X, \varepsilon))^2 \quad (\text{S152})$$

$$= \mathbb{E}_{(\mathbf{x}, y)} \mathbb{E}_{(W_1, X_1, \varepsilon_1)} \mathbb{E}_{(W_2, X_2, \varepsilon_2)} (y - \hat{y}(\mathbf{x}; W_1, X_1, \varepsilon_1))(y - \hat{y}(\mathbf{x}; W_2, X_2, \varepsilon_2)) \quad (\text{S153})$$

$$= \frac{\text{tr}(\Sigma_\beta \Sigma)}{n_0} + E_{21} + H_{000}, \quad (\text{S154})$$

where an expression for  $E_{21}$  was given previously and  $H_{000}$  satisfies

$$H_{000} = \mathbb{E} \hat{y}(\mathbf{x}; W_1, X_1, \varepsilon_1) \hat{y}(\mathbf{x}; W_2, X_2, \varepsilon_2), \quad (\text{S155})$$

where the expectations are over  $\mathbf{x}, W_1, X_1, \varepsilon_1, W_2, X_2$ , and  $\varepsilon_2$ . Recalling the definition of  $\hat{y}$ ,

$$\hat{y}(\mathbf{x}; W, X, \varepsilon) := Y(X, \varepsilon) K(X, X; W)^{-1} K(X, \mathbf{x}; W) \quad (\text{S156})$$

and the techniques described in the previous section, it is straightforward to analyze the above term. First note we can write,

$$\mathbb{E}_{\mathbf{x}} K(X_1, \mathbf{x}; W_1) K(\mathbf{x}, X_2; W_2) = \frac{\rho}{n_0 n_1^2} F_{11}^\top W_1 \Sigma W_2^\top F_{22}. \quad (\text{S157})$$

Here we have defined  $F_{11} \equiv F(W_1, X_1)$  and  $F_{22} \equiv F(W_2, X_2)$ . Now we proceed to calculate  $H_{000}$  as

$$H_{000} = \mathbb{E} \hat{y}(\mathbf{x}; W_1, X_1, \varepsilon) \hat{y}(\mathbf{x}; W_2, X_2, \varepsilon_2) \quad (\text{S158})$$

$$= \mathbb{E} K(\mathbf{x}, X_2; W_2) K(X_2, X_2; W_2)^{-1} Y(X_2, \varepsilon_2)^\top Y(X_1, \varepsilon_1) K(X_1, X_1; W_1)^{-1} K(X_1, \mathbf{x}; W) \quad (\text{S159})$$

$$= \mathbb{E} \text{tr} (K(X_2, X_2; W_2)^{-1} X_2^\top X_1 K(X_1, X_1; W_1)^{-1} K(X_1, \mathbf{x}; W) K(\mathbf{x}, X_2; W_2)) \quad (\text{S160})$$

$$= \frac{\rho}{n_0^2 n_1^2} \mathbb{E} \text{tr} (K_{22}^{-1} X_2^\top \Sigma_\beta X_1 K_{11}^{-1} F_{11}^\top W_1 \Sigma W_2^\top F_{22}) \quad (\text{S161})$$

$$\equiv E_4, \quad (\text{S162})$$

where in the second-to-last line we have defined  $K_{11} \equiv K(X_1, X_1; W_1)$  and  $K_{22} \equiv K(X_2, X_2; W_2)$ .

### G.3 SUMMARY OF LINEARIZED TRACE TERMS

We now summarize the requisite terms needed to compute the total test error, bias, and variance after using cyclicity of the trace to rearrange several of them. In the following, we slightly change notation in order to make explicit the dependence on the covariance matrix  $\Sigma$ . To be specific, whereas above we assumed that the columns of  $X_1$  and  $X_2$  were drawn from multivariate Gaussians with covariance  $\Sigma$ , below we assume that they are drawn from multivariate Gaussians with identity covariance. This change is equivalent to replacing  $X_1 \rightarrow \Sigma^{1/2} X_1$  and  $X_2 \rightarrow \Sigma^{1/2} X_2$  in the above expressions. We utilize this definition so that  $X_1, X_2, W_1, W_2$ , and  $\Theta$  all have iid standard Gaussian entries. From the previous computations, we can now write the requisite terms as,

$$\Sigma_3 = \frac{\rho}{n_0 n_1^2} F_{11}^\top W_1 \Sigma W_1^\top F_{11} + \frac{\eta - \zeta}{n_1^2} F_{11}^\top F_{11} \quad (\text{S163})$$

$$E_{21} = -2 \frac{\sqrt{\rho}}{n_0^{3/2} n_1} \text{tr} \left( X_1^\top \Sigma^{1/2} \Sigma_\beta \Sigma W_1^\top F_{11} K_{11}^{-1} \right) \quad (\text{S164})$$

$$E_{31} = \sigma_\epsilon^2 \text{tr} (K_{11}^{-1} \Sigma_3 K_{11}^{-1}) \quad (\text{S165})$$

$$E_{32} = \frac{1}{n_0} \text{tr} \left( K_{11}^{-1} \Sigma_3 K_{11}^{-1} X_1^\top \Sigma^{1/2} \Sigma_\beta \Sigma^{1/2} X_1 \right) \quad (\text{S166})$$

$$E_4 = \frac{\rho}{n_0^2 n_1^2} \text{tr} \left( F_{22} K_{22}^{-1} X_2^\top \Sigma^{1/2} \Sigma_\beta \Sigma^{1/2} X_1 K_{11}^{-1} F_{11}^\top W_1 \Sigma W_2^\top \right) \quad (\text{S167})$$

$$E_\Sigma = \frac{1}{n_0} \text{tr} (\Sigma \Sigma_\beta) + E_{21} + E_{31} + E_{32} \quad (\text{S168})$$

$$B_\Sigma = \frac{1}{n_0} \text{tr} (\Sigma \Sigma_\beta) + E_{21} + E_4 \quad (\text{S169})$$

$$V_\Sigma = E_\Sigma - B_\Sigma \quad (\text{S170})$$

#### G.4 CALCULATION OF ERROR TERMS

To compute the test error, bias, and total variance, we need to evaluate the asymptotic trace objects appearing in the expressions for  $E_{21}$ ,  $E_{31}$ ,  $E_{32}$ , and  $E_4$ , defined in the previous section. As these expressions are essentially rational functions of the random matrices  $X$ ,  $W$ ,  $\Theta$ ,  $\Sigma$ , and  $\Sigma_\beta$ , these computations can be accomplished by representing the rational functions as single blocks of a suitably-defined block matrix inverse - the so-called linear pencil method (see eg. [Far et al., 2006](#)) - and then applying the theory of operator-valued free probability ([Mingo & Speicher, 2017](#)). These techniques and their application to problems of this type have been well-established elsewhere ([Adlam et al., 2019](#); [Adlam & Pennington, 2020a,b](#)), we only lightly sketch the mathematical details, referring the reader to the literature for a more pedagogical overview. Instead, we focus on presenting the details of the requisite calculations.

Relative to prior work, the main challenge in the current setting is generalizing the calculations to include an arbitrary weight covariance matrix  $\Sigma_\beta$ . This generalization is facilitated by the general theory of operator-valued free probability, and in particular through the subordinated form of the operator-valued self-consistent equations that we first present in eqn. [\(S201\)](#). The form of this equation enables the simple computation of the operator-valued R-transform of the remaining random matrices,  $W$ ,  $X$ , and  $\Theta$ , which are all iid Gaussian and can therefore be obtained simply by using the methods of ([Far et al., 2006](#)). The remaining complication amounts to performing the trace in eqn. [\(S201\)](#), which asymptotically becomes an integral over the LJS  $\mu$ . While this might in general lead to a complicated coupling of many transcendental equations, it turns out that the transcendentalities can be entirely factored into a single scalar fixed-point equation, whose solution we denote by  $x$  (see eqn. [\(S237\)](#)), and the remaining equations are purely algebraic given  $x$ . To facilitate this particular simplification, it is necessary to first compute all of the entries in the operator-valued Stieltjes transform of the kernel matrix  $K$ , which we do in Sec. [G.4.1](#). Using these results, we compute the remaining error terms in the subsequent sections.

As a matter of notation, note that throughout this entire section whenever a matrix  $X$ ,  $X_1$ , or  $X_2$  appears it is composed of iid  $\mathcal{N}(0, 1)$  entries as in Appendix [G.3](#). This differs from the notation of the main paper, but we follow this prescription to ease the already cumbersome presentation. This definition of  $X$  allows us to explicitly extract and represent the training covariance  $\Sigma$  in our calculations.

##### G.4.1 $K^{-1}$

The NCAAlgebra Mathematica package (NCRealization method; algorithm described in [Helton et al., 2006](#)) was used to generate the following matrix pencil  $Q^{K^{-1}}$ :

$$Q^{K^{-1}} = \begin{pmatrix} I_m & \frac{\sqrt{\eta-\zeta}\Theta^\top}{\gamma\sqrt{n_1}} & \frac{\sqrt{\rho}X^\top}{\gamma\sqrt{n_0}} & 0 & 0 & 0 & 0 & 0 & 0 \\ -\frac{\Theta\sqrt{\eta-\zeta}}{\sqrt{n_1}} & I_{n_1} & 0 & 0 & -\frac{\sqrt{\rho}W}{\sqrt{n_1}} & 0 & 0 & 0 & 0 \\ 0 & 0 & I_{n_0} & -\Sigma^{1/2} & 0 & 0 & 0 & 0 & 0 \\ 0 & -\frac{W^\top}{\sqrt{n_1}} & 0 & I_{n_0} & 0 & 0 & \frac{\Sigma_\beta}{\sqrt{\rho}} & 0 & 0 \\ 0 & 0 & 0 & 0 & I_{n_0} & -\Sigma^{1/2} & 0 & 0 & 0 \\ -\frac{X}{\sqrt{n_0}} & 0 & 0 & 0 & 0 & I_{n_0} & 0 & 0 & 0 \\ 0 & 0 & 0 & 0 & 0 & 0 & I_{n_0} & -\Sigma^{1/2} & 0 \\ 0 & 0 & 0 & 0 & 0 & 0 & 0 & I_{n_0} & -\frac{X}{\sqrt{n_0}} \\ 0 & 0 & 0 & 0 & 0 & 0 & 0 & 0 & I_m \end{pmatrix}. \quad (\text{S171})$$

This matrix is specifically chosen so that inverting  $[Q^{K^{-1}}]^\top$  and taking the normalized trace of its first block gives exactly  $\gamma \bar{\text{tr}} K^{-1}$ , the quantity of interest. Computing the full inverse of  $[Q^{K^{-1}}]^\top$  via repeated applications of the Schur complement formula and taking block-wise traces shows that

$$G_{1,1}^{K^{-1}} = \gamma \bar{\text{tr}}(K^{-1}) \quad (\text{S172})$$

$$G_{9,1}^{K^{-1}} = \frac{\phi \bar{\text{tr}}(\Sigma_\beta \Sigma^{1/2} X K^{-1} X^\top \Sigma^{1/2})}{n_0} \quad (\text{S173})$$

$$G_{2,2}^{K^{-1}} = \gamma \bar{\text{tr}}(\hat{K}^{-1}) \quad (\text{S174})$$

$$G_{3,3}^{K^{-1}} = G_{6,6}^{K^{-1}} = 1 - \frac{\sqrt{\rho} \bar{\text{tr}}(\Sigma^{1/2} W^\top F K^{-1} X^\top)}{\sqrt{n_0 n_1}} \quad (\text{S175})$$

$$G_{4,3}^{K^{-1}} = G_{6,5}^{K^{-1}} = \bar{\text{tr}}(\Sigma^{1/2}) - \frac{\sqrt{\rho} \bar{\text{tr}}(\Sigma W^\top F K^{-1} X^\top)}{\sqrt{n_0 n_1}} \quad (\text{S176})$$

$$G_{5,3}^{K^{-1}} = G_{6,4}^{K^{-1}} = \frac{\gamma \sqrt{\rho} \bar{\text{tr}}(\Sigma^{1/2} W^\top \hat{K}^{-1} W)}{n_1} \quad (\text{S177})$$

$$G_{6,3}^{K^{-1}} = \frac{\gamma \sqrt{\rho} \bar{\text{tr}}(\Sigma W^\top \hat{K}^{-1} W)}{n_1} \quad (\text{S178})$$

$$G_{7,3}^{K^{-1}} = \frac{\bar{\text{tr}}(\Sigma_\beta \Sigma^{1/2} W^\top F K^{-1} X^\top \Sigma^{1/2})}{\sqrt{n_0 n_1}} - \frac{\bar{\text{tr}}(\Sigma_\beta \Sigma^{1/2})}{\sqrt{\rho}} \quad (\text{S179})$$

$$G_{8,3}^{K^{-1}} = \frac{\bar{\text{tr}}(\Sigma_\beta \Sigma W^\top F K^{-1} X^\top \Sigma^{1/2})}{\sqrt{n_0 n_1}} - \frac{\bar{\text{tr}}(\Sigma_\beta \Sigma)}{\sqrt{\rho}} \quad (\text{S180})$$

$$G_{3,4}^{K^{-1}} = G_{5,6}^{K^{-1}} = -\frac{\sqrt{\rho} \bar{\text{tr}}(F K^{-1} X^\top W^\top)}{\sqrt{n_0 n_1} \psi} \quad (\text{S181})$$

$$G_{4,4}^{K^{-1}} = G_{5,5}^{K^{-1}} = 1 - \frac{\sqrt{\rho} \bar{\text{tr}}(\Sigma^{1/2} W^\top F K^{-1} X^\top)}{\sqrt{n_0 n_1}} \quad (\text{S182})$$

$$G_{5,4}^{K^{-1}} = \frac{\gamma \sqrt{\rho} \bar{\text{tr}}(\hat{K}^{-1} W W^\top)}{n_1 \psi} \quad (\text{S183})$$

$$G_{7,4}^{K^{-1}} = \frac{\bar{\text{tr}}(\Sigma_\beta \Sigma^{1/2} X F^\top \hat{K}^{-1} W)}{\sqrt{n_0 n_1}} - \frac{\bar{\text{tr}}(\Sigma_\beta)}{\sqrt{\rho}} \quad (\text{S184})$$

$$G_{8,4}^{K^{-1}} = \frac{\bar{\text{tr}}(\Sigma_\beta \Sigma^{1/2} W^\top F K^{-1} X^\top \Sigma^{1/2})}{\sqrt{n_0 n_1}} - \frac{\bar{\text{tr}}(\Sigma_\beta \Sigma^{1/2})}{\sqrt{\rho}} \quad (\text{S185})$$

$$G_{3,5}^{K^{-1}} = G_{4,6}^{K^{-1}} = -\frac{\sqrt{\rho} \bar{\text{tr}}(\Sigma^{1/2} X K^{-1} X^\top)}{n_0} \quad (\text{S186})$$

$$G_{4,5}^{K^{-1}} = -\frac{\sqrt{\rho} \bar{\text{tr}}(\Sigma X K^{-1} X^\top)}{n_0} \quad (\text{S187})$$

$$G_{7,5}^{K^{-1}} = \frac{\bar{\text{tr}}(\Sigma_\beta \Sigma^{1/2} X K^{-1} X^\top \Sigma^{1/2})}{n_0} \quad (\text{S188})$$

$$G_{8,5}^{K^{-1}} = \frac{\bar{\text{tr}}(\Sigma_\beta \Sigma X K^{-1} X^\top \Sigma^{1/2})}{n_0} \quad (\text{S189})$$

$$G_{3,6}^{K^{-1}} = -\frac{\sqrt{\rho} \bar{\text{tr}}(K^{-1} X^\top X)}{n_0 \phi} \quad (\text{S190})$$

$$G_{7,6}^{K^{-1}} = \frac{\bar{\text{tr}}(\Sigma_\beta \Sigma^{1/2} X K^{-1} X^\top)}{n_0} \quad (\text{S191})$$

$$G_{8,6}^{K^{-1}} = \frac{\bar{\text{tr}}(\Sigma_\beta \Sigma^{1/2} X K^{-1} X^\top \Sigma^{1/2})}{n_0} \quad (\text{S192})$$

$$G_{7,7}^{K^{-1}} = G_{8,8}^{K^{-1}} = G_{9,9}^{K^{-1}} = 1 \quad (\text{S193})$$

$$G_{8,7}^{K^{-1}} = \bar{\text{tr}}(\Sigma^{1/2}), \quad (\text{S194})$$

where  $G^{K^{-1}} := \text{id}_9 \otimes \bar{\text{tr}}[(Q^{K^{-1}})^\top]^{-1} \in M_9(\mathbb{C})$  is a scalar  $9 \times 9$  matrix whose  $i, j$  entry  $G_{i,j}^{K^{-1}}$  is the normalized trace of the  $(i, j)$ -block of the inverse of  $[Q^{K^{-1}}]^\top$ . We have also defined  $\hat{K} = \frac{1}{n_1} F F^\top + \gamma I_{n_1}$  (note that  $K$  is  $m \times m$  while  $\hat{K}$  is  $n_1 \times n_1$ ). It is straightforward to verify that when

the  $n_0, n_1, m \rightarrow \infty$  limit is eventually taken, each entry of  $G^{K^{-1}}$  is properly scaled and will tend toward a finite value.

We aim to compute the limiting values of these trace terms as  $n_0, n_1, m \rightarrow \infty$ , as they will be related to the error terms of interest. To proceed, recall that the asymptotic block-wise traces of the inverse of  $Q^{K^{-1}}$  can be determined from its operator-valued Stieltjes transform (Mingo & Speicher, 2017). The simplest way to apply the results of (Far et al., 2006; Mingo & Speicher, 2017) is to augment  $Q^{K^{-1}}$  to form the self-adjoint matrix  $\bar{Q}^{K^{-1}}$ ,

$$\bar{Q}^{K^{-1}} = \begin{pmatrix} 0 & [Q^{K^{-1}}]^\top \\ Q^{K^{-1}} & 0 \end{pmatrix}, \quad (\text{S195})$$

and observe that we can write  $\bar{Q}^{K^{-1}}$  as,

$$\begin{aligned} \bar{Q}^{K^{-1}} &= \bar{Z} - \bar{Q}_{W,X,\Theta}^{K^{-1}} - \bar{Q}_\Sigma^{K^{-1}} \\ &= \begin{pmatrix} 0 & I_9 \\ I_9 & 0 \end{pmatrix} - \begin{pmatrix} 0 & [Q_{W,X,\Theta}^{K^{-1}}]^\top \\ Q_{W,X,\Theta}^{K^{-1}} & 0 \end{pmatrix} - \begin{pmatrix} 0 & [Q_\Sigma^{K^{-1}}]^\top \\ Q_\Sigma^{K^{-1}} & 0 \end{pmatrix}, \end{aligned} \quad (\text{S196})$$

where

$$Q_{W,X,\Theta}^{K^{-1}} = - \begin{pmatrix} 0 & \frac{\sqrt{\eta-\zeta}\Theta^\top}{\gamma\sqrt{n_1}} & \frac{\sqrt{\rho}X^\top}{\gamma\sqrt{n_0}} & 0 & 0 & 0 & 0 & 0 & 0 \\ -\frac{\Theta\sqrt{\eta-\zeta}}{\sqrt{n_1}} & 0 & 0 & 0 & -\frac{\sqrt{\rho}W}{\sqrt{n_1}} & 0 & 0 & 0 & 0 \\ 0 & 0 & 0 & 0 & 0 & 0 & 0 & 0 & 0 \\ 0 & -\frac{W^\top}{\sqrt{n_1}} & 0 & 0 & 0 & 0 & 0 & 0 & 0 \\ 0 & 0 & 0 & 0 & 0 & 0 & 0 & 0 & 0 \\ -\frac{X}{\sqrt{n_0}} & 0 & 0 & 0 & 0 & 0 & 0 & 0 & 0 \\ 0 & 0 & 0 & 0 & 0 & 0 & 0 & 0 & 0 \\ 0 & 0 & 0 & 0 & 0 & 0 & 0 & 0 & -\frac{X}{\sqrt{n_0}} \\ 0 & 0 & 0 & 0 & 0 & 0 & 0 & 0 & 0 \end{pmatrix} \quad (\text{S197})$$

$$Q_\Sigma^{K^{-1}} = - \begin{pmatrix} 0 & 0 & 0 & 0 & 0 & 0 & 0 & 0 & 0 \\ 0 & 0 & 0 & 0 & 0 & 0 & 0 & 0 & 0 \\ 0 & 0 & 0 & -\Sigma^{1/2} & 0 & 0 & 0 & 0 & 0 \\ 0 & 0 & 0 & 0 & 0 & 0 & \frac{\Sigma_\beta}{\sqrt{\rho}} & 0 & 0 \\ 0 & 0 & 0 & 0 & 0 & -\Sigma^{1/2} & 0 & 0 & 0 \\ 0 & 0 & 0 & 0 & 0 & 0 & 0 & 0 & 0 \\ 0 & 0 & 0 & 0 & 0 & 0 & 0 & -\Sigma^{1/2} & 0 \\ 0 & 0 & 0 & 0 & 0 & 0 & 0 & 0 & 0 \\ 0 & 0 & 0 & 0 & 0 & 0 & 0 & 0 & 0 \end{pmatrix}, \quad (\text{S198})$$

and the addition in (S196) is performed block-wise. Note that we have separated the iid Gaussian matrices  $W, X, \Theta$  from the constant terms and from the  $\Sigma$ -dependent terms. Denote by  $\bar{G}^{K^{-1}} \in M_{18}(\mathbb{C})$  the block matrix

$$\bar{G}^{K^{-1}} = \begin{pmatrix} 0 & [G^{K^{-1}}]^\top \\ G^{K^{-1}} & 0 \end{pmatrix} = \text{id}_{18} \otimes \bar{\text{tr}} \left( \bar{Q}^{K^{-1}} \right)^{-1}, \quad (\text{S199})$$

and by  $\bar{G}_\Sigma^{K^{-1}} \in M_{18}(\mathbb{C})$  the operator-valued Stieltjes transform of  $\bar{Q}_\Sigma^{K^{-1}}$ . Using (S196) and the definition of the operator-valued Stieltjes transform  $G_{\bar{Q}_{W,X,\Theta}^{K^{-1}} + \bar{Q}_\Sigma^{K^{-1}}}$ , we can write

$$\bar{G}^{K^{-1}} = \text{id}_{18} \otimes \bar{\text{tr}} \left( \bar{Z} - \bar{Q}_{W,X,\Theta}^{K^{-1}} - \bar{Q}_\Sigma^{K^{-1}} \right)^{-1} = G_{\bar{Q}_{W,X,\Theta}^{K^{-1}} + \bar{Q}_\Sigma^{K^{-1}}}(\bar{Z}) \quad (\text{S200})$$

Thus using the subordinated form of the equations for addition of free variables (Mingo & Speicher 2017; section 9.2 Thm. 11), and the defining equation for  $\bar{G}_\Sigma^{K^{-1}}$ , the operator-valued theory of free probability shows that in the limit  $n_0, n_1, m \rightarrow \infty$ , the Stieltjes transform  $\bar{G}^{K^{-1}}$  satisfies the

following  $18 \times 18$  matrix equation:

$$\begin{aligned}\bar{G}^{K^{-1}} &= \bar{G}_\Sigma^{K^{-1}} (\bar{Z} - \bar{R}_{W,X,\Theta}^{K^{-1}} (\bar{G}^{K^{-1}})) \\ &= \text{id} \otimes \bar{\text{tr}} \left( \bar{Z} - \bar{R}_{W,X,\Theta}^{K^{-1}} (\bar{G}^{K^{-1}}) - \bar{Q}_\Sigma^{K^{-1}} \right)^{-1},\end{aligned}\quad (\text{S201})$$

where  $\bar{R}_{W,X,\Theta}^{K^{-1}} (\bar{G}^{K^{-1}}) \in M_{18}(\mathbb{C})$  is the operator-valued R-transform of  $\bar{Q}_{W,X,\Theta}^{K^{-1}}$ . Note that (S201) is a coupled set of  $18 \times 18$  scalar equations and thus eliminates all reference to large random matrices. To see this, note that  $\bar{Z}, \bar{G}^{K^{-1}}, \bar{R}_{W,X,\Theta}^{K^{-1}} (\bar{G}^{K^{-1}})$  are all scalar-entried  $18 \times 18$  matrices. The right-hand side of (S201) is defined by expanding the inverse to obtain an  $18 \times 18$  block matrix whose blocks involve various rational functions of  $\Sigma, \Sigma_\beta$  and the scalar entries of  $\bar{Z}, \bar{G}^{K^{-1}}, \bar{R}_{W,X,\Theta}^{K^{-1}} (\bar{G}^{K^{-1}})$ . Finally one computes the normalized traces of these blocks, giving scalar values and eliminating all reference to random matrices. Below, when writing out these equations explicitly, we will use the fact that traces of rational functions of  $\Sigma, \Sigma_\beta$  tend toward expectations of the corresponding rational functions over the LJS  $\mu$ . Both here and in the sequel, to ease the already cumbersome presentation, we use  $G^{K^{-1}}$  to also denote the limiting value satisfying (S201).

As described in (Adlam & Pennington, 2020a,b), since  $\bar{Q}_{W,X,\Theta}^{K^{-1}}$  is a block matrix whose blocks are iid Gaussian matrices (and their transposes), an explicit expression for  $\bar{R}_{W,X,\Theta}^{K^{-1}} (\bar{G}^{K^{-1}})$  can be obtained through a covariance map, denoted by  $\eta$  (Far et al., 2006). In particular,  $\eta : M_d(\mathbb{C}) \rightarrow M_d(\mathbb{C})$  is defined by,

$$[\eta(D)]_{ij} = \sum_{kl} \sigma(i, k; l, j) \alpha_k D_{kl}, \quad (\text{S202})$$

where  $\alpha_k$  is dimensionality of the  $k$ th block and  $\sigma(i, k; l, j)$  denotes the covariance between the entries of the blocks  $ij$  block of  $\bar{Q}_{W,X,\Theta}^{K^{-1}}$  and entries of the  $kl$  block of  $\bar{Q}_{W,X,\Theta}^{K^{-1}}$ . Here  $d = 18$  is the number of blocks. When the constituent blocks are iid Gaussian matrices and their transposes, as is the case here, then  $\bar{R}_{W,X,\Theta}^{K^{-1}} = \eta$  (Mingo & Speicher, 2017; section 9.1 and 9.2 Thm. 11), and therefore the entries of  $\bar{R}_{W,X,\Theta}^{K^{-1}}$  can be read off from eqn. (S195). To simplify the presentation, we only report the entries of  $\bar{R}_{W,X,\Theta}^{K^{-1}} (G^{K^{-1}})$  that are nonzero, given the specific sparsity pattern of  $G^{K^{-1}}$ . The latter follows from eqn. (S201) in the manner described in (Mingo & Speicher, 2017; Far et al., 2006). Practically speaking, the sparsity pattern can be obtained by iterating an eqn. (S201), starting with an ansatz sparsity pattern determined by  $\bar{Z}$ , and stopping when the iteration converges to a fixed sparsity pattern. In this case (and all cases that follow in the subsequent sections), the number of necessary iterations is small and can be done explicitly. We omit the details and instead simply report the following results for the nonzero entries:

$$\bar{R}_{W,X,\Theta}^{K^{-1}} (\bar{G}^{K^{-1}}) = \begin{pmatrix} 0 & R_{W,X,\Theta}^{K^{-1}} (G^{K^{-1}})^\top \\ R_{W,X,\Theta}^{K^{-1}} (G^{K^{-1}}) & 0 \end{pmatrix}, \quad (\text{S203})$$

where,

$$[R_{W,X,\Theta}^{K^{-1}} (G^{K^{-1}})]_{1,1} = \frac{G_{2,2}^{K^{-1}} (\zeta - \eta) - \sqrt{\rho} G_{6,3}^{K^{-1}}}{\gamma} \quad (\text{S204})$$

$$[R_{W,X,\Theta}^{K^{-1}} (G^{K^{-1}})]_{1,9} = -\frac{\sqrt{\rho} G_{8,3}^{K^{-1}}}{\gamma} \quad (\text{S205})$$

$$[R_{W,X,\Theta}^{K^{-1}} (G^{K^{-1}})]_{2,2} = \frac{\psi G_{1,1}^{K^{-1}} (\zeta - \eta)}{\gamma \phi} + \sqrt{\rho} \psi G_{4,5}^{K^{-1}} \quad (\text{S206})$$

$$[R_{W,X,\Theta}^{K^{-1}} (G^{K^{-1}})]_{4,5} = \sqrt{\rho} G_{2,2}^{K^{-1}} \quad (\text{S207})$$

$$[R_{W,X,\Theta}^{K^{-1}} (G^{K^{-1}})]_{6,3} = -\frac{\sqrt{\rho} G_{1,1}^{K^{-1}}}{\gamma \phi} \quad (\text{S208})$$

$$[R_{W,X,\Theta}^{K^{-1}} (G^{K^{-1}})]_{8,3} = -\frac{\sqrt{\rho} G_{1,9}^{K^{-1}}}{\gamma \phi}, \quad (\text{S209})$$

and the remaining entries of  $R_{W,X,\Theta}^{K^{-1}}(G^{K^{-1}})$  are zero. Owing to the large degree of sparsity, the matrix inverse in (S201) can be performed explicitly and yields relatively simple expressions that depend on the entries of  $G^{K^{-1}}$  and the matrices  $\Sigma$  and  $\Sigma_\beta$ . For example, the  $(16, 4)$  entry of the self-consistent equation reads,

$$G_{7,4}^{K^{-1}} = \left[ \text{id} \otimes \bar{\text{tr}} \left( \bar{Z} - \bar{R}_{W,X,\Theta}^{K^{-1}}(\bar{G}^{K^{-1}}) - \bar{Q}_\Sigma^{K^{-1}} \right)^{-1} \right]_{16,4} \quad (\text{S210})$$

$$= \bar{\text{tr}} \left[ -\frac{1}{\sqrt{\rho}} \Sigma_\beta \left( I_{n_0} + \frac{\rho}{\phi\gamma} G_{1,1}^{K^{-1}} G_{2,2}^{K^{-1}} \Sigma \right)^{-1} \right] \quad (\text{S211})$$

$$\stackrel{n_0 \rightarrow \infty}{=} -\mathbb{E}_\mu \left[ \frac{q/\sqrt{\rho}}{1 + \frac{x}{\phi}\lambda} \right] \quad (\text{S212})$$

$$= -\frac{\mathcal{I}_{0,1}^\beta}{\sqrt{\rho}}, \quad (\text{S213})$$

where to compute the asymptotic normalized trace we moved to an eigenbasis of  $\Sigma$  and recalled the definition of the LJSD  $\mu$  and the definition of  $\mathcal{I}^\beta$  in Eq. (12). The remaining entries of the (S201) can be obtained in a similar manner and together yield the following set of coupled equations for the entries of  $G^{K^{-1}}$ ,

$$G_{1,1}^{K^{-1}} = -\frac{\gamma}{-G_{2,2}^{K^{-1}}(-\zeta + \eta + \rho) + \rho G_{2,2}^{K^{-1}} - \sqrt{\rho} G_{6,3}^{K^{-1}} - \gamma} \quad (\text{S214})$$

$$G_{2,2}^{K^{-1}} = \frac{\gamma\phi}{\psi G_{1,1}^{K^{-1}}(\eta - \zeta) - \gamma\phi(\sqrt{\rho}\psi G_{4,5}^{K^{-1}} - 1)} \quad (\text{S215})$$

$$G_{3,6}^{K^{-1}} = \mathbb{E}_\mu \left[ \frac{\sqrt{\rho} G_{1,1}^{K^{-1}}}{-\lambda\rho G_{1,1}^{K^{-1}} G_{2,2}^{K^{-1}} - \gamma\phi} \right] \quad (\text{S216})$$

$$G_{4,5}^{K^{-1}} = \mathbb{E}_\mu \left[ \frac{\lambda\sqrt{\rho} G_{1,1}^{K^{-1}}}{-\lambda\rho G_{1,1}^{K^{-1}} G_{2,2}^{K^{-1}} - \gamma\phi} \right] \quad (\text{S217})$$

$$G_{5,4}^{K^{-1}} = \mathbb{E}_\mu \left[ -\frac{\gamma\sqrt{\rho}\phi G_{2,2}^{K^{-1}}}{-\lambda\rho G_{1,1}^{K^{-1}} G_{2,2}^{K^{-1}} - \gamma\phi} \right] \quad (\text{S218})$$

$$G_{6,3}^{K^{-1}} = \mathbb{E}_\mu \left[ -\frac{\gamma\lambda\sqrt{\rho}\phi G_{2,2}^{K^{-1}}}{-\lambda\rho G_{1,1}^{K^{-1}} G_{2,2}^{K^{-1}} - \gamma\phi} \right] \quad (\text{S219})$$

$$G_{7,4}^{K^{-1}} = \mathbb{E}_\mu \left[ -\frac{q\gamma\phi}{\sqrt{\rho}(\lambda\rho G_{1,1}^{K^{-1}} G_{2,2}^{K^{-1}} + \gamma\phi)} \right] \quad (\text{S220})$$

$$G_{7,6}^{K^{-1}} = \mathbb{E}_\mu \left[ \frac{q\sqrt{\lambda} G_{1,1}^{K^{-1}}}{\lambda\rho G_{1,1}^{K^{-1}} G_{2,2}^{K^{-1}} + \gamma\phi} \right] \quad (\text{S221})$$

$$G_{8,3}^{K^{-1}} = \mathbb{E}_\mu \left[ -\frac{q\gamma\lambda\phi}{\sqrt{\rho}(\lambda\rho G_{1,1}^{K^{-1}} G_{2,2}^{K^{-1}} + \gamma\phi)} \right] \quad (\text{S222})$$

$$G_{8,5}^{K^{-1}} = \mathbb{E}_\mu \left[ \frac{q\lambda^{3/2} G_{1,1}^{K^{-1}}}{\lambda\rho G_{1,1}^{K^{-1}} G_{2,2}^{K^{-1}} + \gamma\phi} \right] \quad (\text{S223})$$

$$G_{8,7}^{K^{-1}} = \mathbb{E}_\mu \left[ \sqrt{\lambda} \right] \quad (\text{S224})$$

$$G_{9,1}^{K^{-1}} = \frac{\sqrt{\rho} G_{8,3}^{K^{-1}}}{-G_{2,2}^{K^{-1}}(-\zeta + \eta + \rho) + \rho G_{2,2}^{K^{-1}} - \sqrt{\rho} G_{6,3}^{K^{-1}} - \gamma} \quad (\text{S225})$$

$$G_{3,4}^{K^{-1}} = G_{5,6}^{K^{-1}} = \mathbb{E}_\mu \left[ \frac{\sqrt{\lambda}\rho G_{1,1}^{K^{-1}} G_{2,2}^{K^{-1}}}{-\lambda\rho G_{1,1}^{K^{-1}} G_{2,2}^{K^{-1}} - \gamma\phi} \right] \quad (\text{S226})$$

$$G_{3,5}^{K^{-1}} = G_{4,6}^{K^{-1}} = \mathbb{E}_\mu \left[ -\frac{\sqrt{\lambda}\sqrt{\rho} G_{1,1}^{K^{-1}}}{\lambda\rho G_{1,1}^{K^{-1}} G_{2,2}^{K^{-1}} + \gamma\phi} \right] \quad (\text{S227})$$

$$G_{4,3}^{K^{-1}} = G_{6,5}^{K^{-1}} = \mathbb{E}_\mu \left[ -\frac{\gamma\sqrt{\lambda}\phi}{-\lambda\rho G_{1,1}^{K^{-1}} G_{2,2}^{K^{-1}} - \gamma\phi} \right] \quad (\text{S228})$$

$$G_{5,3}^{K^{-1}} = G_{6,4}^{K^{-1}} = \mathbb{E}_\mu \left[ \frac{\gamma\sqrt{\lambda}\sqrt{\rho}\phi G_{2,2}^{K^{-1}}}{\lambda\rho G_{1,1}^{K^{-1}} G_{2,2}^{K^{-1}} + \gamma\phi} \right] \quad (\text{S229})$$

$$G_{7,3}^{K^{-1}} = G_{8,4}^{K^{-1}} = \mathbb{E}_\mu \left[ -\frac{q\gamma\sqrt{\lambda}\phi}{\sqrt{\rho}(\lambda\rho G_{1,1}^{K^{-1}} G_{2,2}^{K^{-1}} + \gamma\phi)} \right] \quad (\text{S230})$$

$$G_{7,5}^{K^{-1}} = G_{8,6}^{K^{-1}} = \mathbb{E}_\mu \left[ \frac{q\lambda G_{1,1}^{K^{-1}}}{\lambda\rho G_{1,1}^{K^{-1}} G_{2,2}^{K^{-1}} + \gamma\phi} \right] \quad (\text{S231})$$

$$G_{7,7}^{K^{-1}} = G_{8,8}^{K^{-1}} = G_{9,9}^{K^{-1}} = 1 \quad (\text{S232})$$

$$G_{3,3}^{K^{-1}} = G_{4,4}^{K^{-1}} = G_{5,5}^{K^{-1}} = G_{6,6}^{K^{-1}} = \mathbb{E}_\mu \left[ -\frac{\gamma\phi}{-\lambda\rho G_{1,1}^{K^{-1}} G_{2,2}^{K^{-1}} - \gamma\phi} \right], \quad (\text{S233})$$

where we have used the fact that, asymptotically, the normalized trace becomes equivalent to an expectation over  $\mu$ . After eliminating  $G_{6,3}^{K^{-1}}$  and  $G_{4,5}^{K^{-1}}$  from the first two equations, it is straightforward to show that

$$\tau_1 \equiv \bar{\text{tr}}(K^{-1}) = \frac{1}{\gamma} G_{1,1}^{K^{-1}} = \frac{\sqrt{(\psi - \phi)^2 + 4x\psi\phi\gamma/\rho} + \psi - \phi}{2\psi\gamma} \quad (\text{S234})$$

$$\bar{\tau}_1 \equiv \bar{\text{tr}}(\hat{K}^{-1}) = \frac{1}{\gamma} G_{2,2}^{K^{-1}} = \frac{1}{\gamma} + \frac{\psi}{\phi} \left( \tau_1 - \frac{1}{\gamma} \right) \quad (\text{S235})$$

$$\tau_2 \equiv \bar{\text{tr}}\left(\frac{1}{n_0} X^\top \Sigma^{1/2} \Sigma_\beta \Sigma^{1/2} X K^{-1}\right) = \tau_1 \mathcal{I}_{1,1}^\beta \quad (\text{S236})$$

where we have used the notation  $\tau_1$  and  $\tau_2$  from (Adlam & Pennington, 2020a,b), and  $\bar{\tau}_1$  is the companion transform of  $\tau_1$ , and where  $x$  satisfies the self-consistent equation,

$$x = \frac{1 - \gamma\tau_1}{\omega + \mathcal{I}_{1,1}} = \frac{1 - \frac{\sqrt{(\psi - \phi)^2 + 4x\psi\phi\gamma/\rho} + \psi - \phi}{2\psi}}{\omega + \mathcal{I}_{1,1}}. \quad (\text{S237})$$

Here we utilized the two-index set of functionals of  $\mu$ ,  $\mathcal{I}_{a,b}$  defined in Eq. (12).

Note that the product  $\tau_1 \bar{\tau}_1$  is simply related to  $x$ ,

$$x = \gamma\rho\tau_1\bar{\tau}_1, \quad (\text{S238})$$

so that, given  $x$ , the equations for the remaining entries of  $G^{K^{-1}}$  completely decouple. In particular,

$$G_{3,6}^{K^{-1}} = -\frac{\sqrt{\rho}G_{1,1}^{K^{-1}}\mathcal{I}_{0,1}}{\gamma\phi} \quad (\text{S239})$$

$$G_{4,5}^{K^{-1}} = -\frac{\sqrt{\rho}G_{1,1}^{K^{-1}}\mathcal{I}_{1,1}}{\gamma\phi} \quad (\text{S240})$$

$$G_{5,4}^{K^{-1}} = \sqrt{\rho}G_{2,2}^{K^{-1}}\mathcal{I}_{0,1} \quad (\text{S241})$$

$$G_{6,3}^{K^{-1}} = \sqrt{\rho}G_{2,2}^{K^{-1}}\mathcal{I}_{1,1} \quad (\text{S242})$$

$$G_{7,4}^{K^{-1}} = -\frac{\mathcal{I}_{0,1}^\beta}{\sqrt{\rho}} \quad (\text{S243})$$

$$G_{7,6}^{K^{-1}} = \frac{\mathcal{I}_{\frac{1}{2},1}^\beta G_{1,1}^{K^{-1}}}{\gamma\phi} \quad (\text{S244})$$

$$G_{8,3}^{K^{-1}} = -\frac{\mathcal{I}_{1,1}^\beta}{\sqrt{\rho}} \quad (\text{S245})$$

$$G_{8,5}^{K^{-1}} = \frac{\mathcal{I}_{\frac{3}{2},1}^\beta G_{1,1}^{K^{-1}}}{\gamma\phi} \quad (\text{S246})$$

$$G_{8,7}^{K^{-1}} = \frac{\mathcal{I}_{\frac{1}{2},0}}{\phi} \quad (\text{S247})$$

$$G_{9,1}^{K^{-1}} = -\frac{\sqrt{\rho}G_{1,1}^{K^{-1}}G_{8,3}^{K^{-1}}}{\gamma} \quad (\text{S248})$$

$$G_{3,4}^{K^{-1}} = G_{5,6}^{K^{-1}} = -\frac{x\mathcal{I}_{\frac{1}{2},1}}{\phi} \quad (\text{S249})$$

$$G_{3,5}^{K^{-1}} = G_{4,6}^{K^{-1}} = -\frac{\sqrt{\rho}G_{1,1}^{K^{-1}}\mathcal{I}_{\frac{1}{2},1}}{\gamma\phi} \quad (\text{S250})$$

$$G_{4,3}^{K^{-1}} = G_{6,5}^{K^{-1}} = \mathcal{I}_{\frac{1}{2},1} \quad (\text{S251})$$

$$G_{5,3}^{K^{-1}} = G_{6,4}^{K^{-1}} = \sqrt{\rho}G_{2,2}^{K^{-1}}\mathcal{I}_{\frac{1}{2},1} \quad (\text{S252})$$

$$G_{7,3}^{K^{-1}} = G_{8,4}^{K^{-1}} = -\frac{\mathcal{I}_{\frac{1}{2},1}^\beta}{\sqrt{\rho}} \quad (\text{S253})$$

$$G_{7,5}^{K^{-1}} = G_{8,6}^{K^{-1}} = \frac{\mathcal{I}_{1,1}^\beta G_{1,1}^{K^{-1}}}{\gamma\phi} \quad (\text{S254})$$

$$G_{7,7}^{K^{-1}} = G_{8,8}^{K^{-1}} = G_{9,9}^{K^{-1}} = 1 \quad (\text{S255})$$

$$G_{3,3}^{K^{-1}} = G_{4,4}^{K^{-1}} = G_{5,5}^{K^{-1}} = G_{6,6}^{K^{-1}} = \mathcal{I}_{0,1}, \quad (\text{S256})$$

which will be important intermediate results for the subsequent sections.

Finally, we note that these results are sufficient to compute the training error. The expected training loss can be written as,

$$E_{\text{train}} = \frac{1}{m} \mathbb{E} \text{tr}((Y - \hat{y}(X))(Y - \hat{y}(X))^\top) \quad (\text{S257})$$

$$= \frac{\gamma^2}{m} \mathbb{E} \text{tr}(Y^\top Y K^{-2}) \quad (\text{S258})$$

$$= \frac{\gamma^2}{m} \mathbb{E} \text{tr}\left(\frac{1}{n_0} (X^\top \Sigma^{1/2} \Sigma_\beta \Sigma^{1/2} X + \sigma_\varepsilon^2 I_m) K^{-2}\right) \quad (\text{S259})$$

$$= -\gamma^2 (\partial_\gamma \tau_2 + \sigma_\varepsilon^2 \partial_\gamma \tau_1) \quad (\text{S260})$$

$$= -\gamma^2 \left( \partial_\gamma (\tau_1 \mathcal{I}_{1,1}^\beta) + \sigma_\varepsilon^2 \partial_\gamma \tau_1 \right). \quad (\text{S261})$$

#### G.4.2 $E_{21}$

The calculation of  $E_{21}$  proceeds exactly as in (Tripuraneni et al., 2021a,b) with the simple modification of including an additional factor  $\Sigma_\beta$  inside the final trace term, yielding

$$E_{21} = -2 \frac{x}{\phi} \mathcal{I}_{2,1}^\beta. \quad (\text{S262})$$

#### G.4.3 $E_{31}$

The calculation of  $E_{31}$  proceeds exactly as in (Tripuraneni et al., 2021a,b) with no modifications since there is no dependence on  $\Sigma_\beta$ . The result is,

$$E_{31} = -\rho \frac{\psi}{\phi} \frac{\partial x}{\partial \gamma} \left( \sigma_\varepsilon^2 \left( (\omega + \phi \mathcal{I}_{1,2})(\omega + \mathcal{I}_{1,1}) + \frac{\phi}{\psi} \gamma \bar{\tau}_1 \mathcal{I}_{2,2} \right) \right), \quad (\text{S263})$$



G.4.4  $E_{32}$ 

Define the block matrix  $Q^{E_{32}} \equiv [Q_1^{E_{32}} \ Q_2^{E_{32}}]$  by,

$$Q_1^{E_{32}} = \begin{pmatrix} I_m & \frac{\sqrt{\eta-\zeta}\Theta^\top}{\gamma\sqrt{n_1}} & \frac{\sqrt{\rho}X^\top}{\gamma\sqrt{n_0}} & 0 & 0 & 0 & \frac{\sqrt{\eta-\zeta}\Theta^\top(\zeta-\eta)}{\gamma\sqrt{n_1}} & 0 \\ -\frac{\Theta\sqrt{\eta-\zeta}}{\sqrt{n_1}} & I_{n_1} & 0 & 0 & -\frac{\sqrt{\rho}W}{\sqrt{n_1}} & 0 & 0 & 0 \\ 0 & 0 & I_{n_0} & -\Sigma^{1/2} & 0 & 0 & 0 & \Sigma^{1/2}(\eta-\zeta) \\ 0 & -\frac{W^\top}{\sqrt{n_1}} & 0 & I_{n_0} & 0 & 0 & 0 & 0 \\ 0 & 0 & 0 & 0 & I_{n_0} & -\Sigma^{1/2} & 0 & \frac{n_1\Sigma\rho}{n_0\sqrt{\rho}} \\ -\frac{X}{\sqrt{n_0}} & 0 & 0 & 0 & 0 & I_{n_0} & 0 & 0 \\ 0 & 0 & 0 & 0 & 0 & 0 & I_{n_1} & 0 \\ 0 & 0 & 0 & 0 & 0 & 0 & -\frac{W^\top}{\sqrt{n_1}} & I_{n_0} \\ 0 & 0 & 0 & 0 & 0 & 0 & \frac{\sqrt{\eta-\zeta}\Theta^\top}{\gamma\sqrt{n_1}} & 0 \\ 0 & 0 & 0 & 0 & 0 & 0 & 0 & 0 \\ 0 & 0 & 0 & 0 & 0 & 0 & 0 & 0 \\ 0 & 0 & 0 & 0 & 0 & 0 & 0 & 0 \\ 0 & 0 & 0 & 0 & 0 & 0 & -\frac{W^\top}{\sqrt{n_1}} & 0 \\ 0 & 0 & 0 & 0 & 0 & 0 & 0 & 0 \\ 0 & 0 & 0 & 0 & 0 & 0 & 0 & 0 \\ 0 & 0 & 0 & 0 & 0 & 0 & 0 & 0 \end{pmatrix}, \quad (S264)$$

and,

$$Q_2^{E_{32}} = \begin{pmatrix} 0 & 0 & 0 & 0 & 0 & 0 & 0 & 0 \\ 0 & 0 & 0 & 0 & 0 & 0 & 0 & 0 \\ 0 & 0 & 0 & 0 & 0 & 0 & 0 & 0 \\ 0 & 0 & 0 & 0 & 0 & 0 & 0 & 0 \\ 0 & 0 & 0 & 0 & 0 & 0 & 0 & 0 \\ -\frac{\Theta\sqrt{\eta-\zeta}}{\sqrt{n_1}} & -\frac{\sqrt{\rho}W}{\sqrt{n_1}} & 0 & 0 & 0 & 0 & 0 & 0 \\ 0 & 0 & 0 & 0 & 0 & 0 & 0 & 0 \\ I_m & 0 & 0 & \frac{\sqrt{\rho}X^\top}{\gamma\sqrt{n_0}} & 0 & 0 & 0 & 0 \\ 0 & I_{n_0} & -\Sigma^{1/2} & 0 & 0 & 0 & 0 & 0 \\ -\frac{X}{\sqrt{n_0}} & 0 & I_{n_0} & 0 & 0 & 0 & 0 & 0 \\ 0 & 0 & 0 & I_{n_0} & -\Sigma^{1/2} & 0 & 0 & 0 \\ 0 & 0 & 0 & 0 & I_{n_0} & \frac{\Sigma\beta}{\sqrt{\rho}} & 0 & 0 \\ 0 & 0 & 0 & 0 & 0 & I_{n_0} & -\Sigma^{1/2} & 0 \\ 0 & 0 & 0 & 0 & 0 & 0 & I_{n_0} & -\frac{X}{\sqrt{n_0}} \\ 0 & 0 & 0 & 0 & 0 & 0 & 0 & I_m \end{pmatrix}. \quad (S265)$$

Then block matrix inversion (i.e. repeated applications of the Schur complement formula) shows that,

$$G_{8,8}^{E_{32}} = G_{14,14}^{E_{32}} = G_{15,15}^{E_{32}} = G_{16,16}^{E_{32}} = 1 \quad (S266)$$

$$G_{1,1}^{E_{32}} = G_{9,9}^{E_{32}} = G_{1,1}^{K^{-1}} \quad (S267)$$

$$G_{2,2}^{E_{32}} = G_{7,7}^{E_{32}} = G_{2,2}^{K^{-1}} \quad (S268)$$

$$G_{13,8}^{E_{32}} = G_{3,3}^{K^{-1}} - 1 \quad (S269)$$

$$G_{3,3}^{E_{32}} = G_{6,6}^{E_{32}} = G_{11,11}^{E_{32}} = G_{12,12}^{E_{32}} = G_{4,4}^{E_{32}} = G_{5,5}^{E_{32}} = G_{10,10}^{E_{32}} = G_{13,13}^{E_{32}} = G_{3,3}^{K^{-1}} \quad (S270)$$

$$G_{3,4}^{E_{32}} = G_{5,6}^{E_{32}} = G_{10,11}^{E_{32}} = G_{12,8}^{E_{32}} = G_{12,13}^{E_{32}} = G_{3,4}^{K^{-1}} \quad (S271)$$

$$G_{3,5}^{E_{32}} = G_{4,6}^{E_{32}} = G_{12,10}^{E_{32}} = G_{13,11}^{E_{32}} = G_{3,5}^{K^{-1}} \quad (S272)$$

$$G_{3,6}^{E_{32}} = G_{12,11}^{E_{32}} = G_{3,6}^{K^{-1}} \quad (S273)$$

$$G_{4,3}^{E_{32}} = G_{6,5}^{E_{32}} = G_{11,10}^{E_{32}} = G_{13,12}^{E_{32}} = G_{4,3}^{K^{-1}} \quad (S274)$$

$$G_{4,5}^{E_{32}} = G_{13,10}^{E_{32}} = G_{4,5}^{K^{-1}} \quad (S275)$$

$$G_{5,3}^{E_{32}} = G_{6,4}^{E_{32}} = G_{10,12}^{E_{32}} = G_{11,8}^{E_{32}} = G_{11,13}^{E_{32}} = G_{5,3}^{K^{-1}} \quad (S276)$$

$$G_{5,4}^{E_{32}} = G_{10,8}^{E_{32}} = G_{10,13}^{E_{32}} = G_{5,4}^{K^{-1}} \quad (S277)$$

$$G_{6,3}^{E_{32}} = G_{11,12}^{E_{32}} = G_{6,3}^{K^{-1}} \quad (S278)$$

$$G_{14,12}^{E_{32}} = G_{15,13}^{E_{32}} = G_{7,3}^{K^{-1}} \quad (S279)$$

$$G_{14,13}^{E_{32}} = G_{7,4}^{K^{-1}} \quad (\text{S280})$$

$$G_{14,11}^{E_{32}} = G_{7,6}^{K^{-1}} \quad (\text{S281})$$

$$G_{15,12}^{E_{32}} = G_{8,3}^{K^{-1}} \quad (\text{S282})$$

$$G_{15,10}^{E_{32}} = G_{8,5}^{K^{-1}} \quad (\text{S283})$$

$$G_{15,14}^{E_{32}} = G_{8,7}^{K^{-1}} \quad (\text{S284})$$

$$G_{16,9}^{E_{32}} = G_{9,1}^{K^{-1}} \quad (\text{S285})$$

$$G_{14,10}^{E_{32}} = G_{15,11}^{E_{32}} = \frac{G_{9,1}^{K^{-1}}}{\phi} \quad (\text{S286})$$

$$G_{16,1}^{E_{32}} = \frac{\phi}{\psi} E_{32}, \quad (\text{S287})$$

where  $G_{i,j}^{E_{32}}$  denotes the normalized trace of the  $(i, j)$ -block of the inverse of  $(Q^{E_{32}})^\top$ . For brevity, we have suppressed the expressions for the other non-zero blocks.

To compute the limiting values of these traces, we require the asymptotic block-wise traces of  $Q^{E_{32}}$ , which may be determined from the operator-valued Stieltjes transform. To proceed, we first augment  $Q^{E_{32}}$  to form the self-adjoint matrix  $\bar{Q}^{E_{32}}$ ,

$$\bar{Q}^{E_{32}} = \begin{pmatrix} 0 & [Q^{E_{32}}]^\top \\ Q^{E_{32}} & 0 \end{pmatrix}. \quad (\text{S288})$$

and observe that we can write  $\bar{Q}^{E_{32}}$  as,

$$\begin{aligned} \bar{Q}^{E_{32}} &= \bar{Z} - \bar{Q}_{W,X,\Theta}^{E_{32}} - \bar{Q}_\Sigma^{E_{32}} \\ &= \begin{pmatrix} 0 & I_{16} \\ I_{16} & 0 \end{pmatrix} - \begin{pmatrix} 0 & [Q_{W,X,\Theta}^{E_{32}}]^\top \\ Q_{W,X,\Theta}^{E_{32}} & 0 \end{pmatrix} - \begin{pmatrix} 0 & [Q_\Sigma^{E_{32}}]^\top \\ Q_\Sigma^{E_{32}} & 0 \end{pmatrix}, \end{aligned} \quad (\text{S289})$$

where  $Q_{W,X,\theta}^{E_{32}} \equiv [[Q_{W,X,\theta}^{E_{32}}]_1 \ [Q_{W,X,\theta}^{E_{32}}]_2]$  and,

$$[Q_{W,X,\theta}^{E_{32}}]_1 = - \begin{pmatrix} 0 & \frac{\sqrt{\eta-\zeta}\Theta^\top}{\gamma\sqrt{n_1}} & \frac{\sqrt{\rho}X^\top}{\gamma\sqrt{n_0}} & 0 & 0 & 0 & \frac{\sqrt{\eta-\zeta}\Theta^\top(\zeta-\eta)}{\gamma\sqrt{n_1}} & 0 \\ -\frac{\Theta\sqrt{\eta-\zeta}}{\sqrt{n_1}} & 0 & 0 & 0 & -\frac{\sqrt{\rho}W}{\sqrt{n_1}} & 0 & 0 & 0 \\ 0 & 0 & 0 & 0 & 0 & 0 & 0 & 0 \\ 0 & -\frac{W^\top}{\sqrt{n_1}} & 0 & 0 & 0 & 0 & 0 & 0 \\ 0 & 0 & 0 & 0 & 0 & 0 & 0 & 0 \\ -\frac{X}{\sqrt{n_0}} & 0 & 0 & 0 & 0 & 0 & 0 & 0 \\ 0 & 0 & 0 & 0 & 0 & 0 & 0 & 0 \\ 0 & 0 & 0 & 0 & 0 & 0 & -\frac{W^\top}{\sqrt{n_1}} & 0 \\ 0 & 0 & 0 & 0 & 0 & 0 & \frac{\sqrt{\eta-\zeta}\Theta^\top}{\gamma\sqrt{n_1}} & 0 \\ 0 & 0 & 0 & 0 & 0 & 0 & 0 & 0 \\ 0 & 0 & 0 & 0 & 0 & 0 & 0 & 0 \\ 0 & 0 & 0 & 0 & 0 & 0 & 0 & 0 \\ 0 & 0 & 0 & 0 & 0 & 0 & -\frac{W^\top}{\sqrt{n_1}} & 0 \\ 0 & 0 & 0 & 0 & 0 & 0 & 0 & 0 \\ 0 & 0 & 0 & 0 & 0 & 0 & 0 & 0 \\ 0 & 0 & 0 & 0 & 0 & 0 & 0 & 0 \end{pmatrix} \quad (\text{S290})$$

$$[Q_{W,X,\theta}^{E_{32}}]_2 = - \begin{pmatrix} 0 & 0 & 0 & 0 & 0 & 0 & 0 & 0 \\ 0 & 0 & 0 & 0 & 0 & 0 & 0 & 0 \\ 0 & 0 & 0 & 0 & 0 & 0 & 0 & 0 \\ 0 & 0 & 0 & 0 & 0 & 0 & 0 & 0 \\ 0 & 0 & 0 & 0 & 0 & 0 & 0 & 0 \\ 0 & 0 & 0 & 0 & 0 & 0 & 0 & 0 \\ -\frac{\Theta\sqrt{\eta-\zeta}}{\sqrt{n_1}} & -\frac{\sqrt{\rho}W}{\sqrt{n_1}} & 0 & 0 & 0 & 0 & 0 & 0 \\ 0 & 0 & 0 & 0 & 0 & 0 & 0 & 0 \\ 0 & 0 & 0 & \frac{\sqrt{\rho}X^\top}{\gamma\sqrt{n_0}} & 0 & 0 & 0 & 0 \\ 0 & 0 & 0 & 0 & 0 & 0 & 0 & 0 \\ -\frac{X}{\sqrt{n_0}} & 0 & 0 & 0 & 0 & 0 & 0 & 0 \\ 0 & 0 & 0 & 0 & 0 & 0 & 0 & 0 \\ 0 & 0 & 0 & 0 & 0 & 0 & 0 & 0 \\ 0 & 0 & 0 & 0 & 0 & 0 & 0 & 0 \\ 0 & 0 & 0 & 0 & 0 & 0 & -\frac{X}{\sqrt{n_0}} & 0 \\ 0 & 0 & 0 & 0 & 0 & 0 & 0 & 0 \end{pmatrix} \quad (\text{S291})$$

$$Q_{\Sigma}^{E_{32}} = - \begin{pmatrix} 0 & 0 & 0 & 0 & 0 & 0 & 0 & 0 & 0 & 0 & 0 & 0 & 0 & 0 & 0 & 0 \\ 0 & 0 & 0 & 0 & 0 & 0 & 0 & 0 & 0 & 0 & 0 & 0 & 0 & 0 & 0 & 0 \\ 0 & 0 & 0 & -\Sigma^{1/2} & 0 & 0 & 0 & \Sigma^{1/2}(\eta - \zeta) & 0 & 0 & 0 & 0 & 0 & 0 & 0 & 0 \\ 0 & 0 & 0 & 0 & 0 & 0 & 0 & 0 & 0 & 0 & 0 & 0 & 0 & 0 & 0 & 0 \\ 0 & 0 & 0 & 0 & 0 & -\Sigma^{1/2} & 0 & \frac{n_1 \Sigma \rho}{n_0 \sqrt{\rho}} & 0 & 0 & 0 & 0 & 0 & 0 & 0 & 0 \\ 0 & 0 & 0 & 0 & 0 & 0 & 0 & 0 & 0 & 0 & 0 & 0 & 0 & 0 & 0 & 0 \\ 0 & 0 & 0 & 0 & 0 & 0 & 0 & 0 & 0 & 0 & 0 & 0 & 0 & 0 & 0 & 0 \\ 0 & 0 & 0 & 0 & 0 & 0 & 0 & 0 & 0 & 0 & 0 & 0 & 0 & 0 & 0 & 0 \\ 0 & 0 & 0 & 0 & 0 & 0 & 0 & 0 & 0 & 0 & 0 & 0 & 0 & 0 & 0 & 0 \\ 0 & 0 & 0 & 0 & 0 & 0 & 0 & 0 & 0 & 0 & 0 & 0 & 0 & 0 & 0 & 0 \\ 0 & 0 & 0 & 0 & 0 & 0 & 0 & 0 & 0 & -\Sigma^{1/2} & 0 & 0 & 0 & 0 & 0 & 0 \\ 0 & 0 & 0 & 0 & 0 & 0 & 0 & 0 & 0 & 0 & 0 & 0 & 0 & 0 & 0 & 0 \\ 0 & 0 & 0 & 0 & 0 & 0 & 0 & 0 & 0 & 0 & 0 & -\Sigma^{1/2} & 0 & 0 & 0 & 0 \\ 0 & 0 & 0 & 0 & 0 & 0 & 0 & 0 & 0 & 0 & 0 & 0 & \frac{\Sigma \beta}{\sqrt{\rho}} & 0 & 0 & 0 \\ 0 & 0 & 0 & 0 & 0 & 0 & 0 & 0 & 0 & 0 & 0 & 0 & 0 & -\Sigma^{1/2} & 0 & 0 \\ 0 & 0 & 0 & 0 & 0 & 0 & 0 & 0 & 0 & 0 & 0 & 0 & 0 & 0 & 0 & 0 \\ 0 & 0 & 0 & 0 & 0 & 0 & 0 & 0 & 0 & 0 & 0 & 0 & 0 & 0 & 0 & 0 \end{pmatrix}. \quad (\text{S292})$$

The operator-valued Stieltjes transforms satisfy,

$$\begin{aligned} \bar{G}^{E_{32}} &= \bar{G}_{\Sigma}^{E_{32}} (\bar{Z} - \bar{R}_{W,X,\Theta}^{E_{32}} (\bar{G}^{E_{32}})) \\ &= \text{id} \otimes \bar{\text{tr}} \left( \bar{Z} - \bar{R}_{W,X,\Theta}^{E_{32}} (\bar{G}^{E_{32}}) - \bar{Q}_{\Sigma}^{E_{32}} \right)^{-1}, \end{aligned} \quad (\text{S293})$$

where  $\bar{R}_{W,X,\Theta}^{E_{32}} (\bar{G}^{E_{32}})$  is the operator-valued R-transform of  $\bar{Q}_{W,X,\Theta}^{E_{32}}$ . As discussed above, since  $\bar{Q}_{W,X,\Theta}^{E_{32}}$  is a block matrix whose blocks are iid Gaussian matrices (and their transposes), an explicit expression for  $\bar{R}_{W,X,\Theta}^{E_{32}} (\bar{G}^{E_{32}})$  can be obtained from the covariance map  $\eta$ , which can be read off from eqn. (S288). As above, we utilize the specific sparsity pattern for  $G^{E_{32}}$  that is induced by Eq. (S293), to obtain,

$$\bar{R}_{W,X,\Theta}^{E_{32}} (\bar{G}^{E_{32}}) = \begin{pmatrix} 0 & R_{W,X,\Theta}^{E_{32}} (G^{E_{32}})^{\top} \\ R_{W,X,\Theta}^{E_{32}} (G^{E_{32}}) & 0 \end{pmatrix}, \quad (\text{S294})$$

where,

$$[R_{W,X,\Theta}^{E_{32}} (G^{E_{32}})]_{1,1} = \frac{G_{2,2}^{E_{32}} (\zeta - \eta)}{\gamma} - \frac{\sqrt{\rho} G_{6,3}^{E_{32}}}{\gamma} + \frac{G_{2,7}^{E_{32}} (\zeta - \eta) (\zeta - \eta)}{\gamma} \quad (\text{S295})$$

$$[R_{W,X,\Theta}^{E_{32}} (G^{E_{32}})]_{1,9} = \frac{G_{7,2}^{E_{32}} (\zeta - \eta)}{\gamma} - \frac{\sqrt{\rho} G_{11,3}^{E_{32}}}{\gamma} + \frac{G_{7,7}^{E_{32}} (\zeta - \eta) (\zeta - \eta)}{\gamma} \quad (\text{S296})$$

$$[R_{W,X,\Theta}^{E_{32}} (G^{E_{32}})]_{1,16} = -\frac{\sqrt{\rho} G_{15,3}^{E_{32}}}{\gamma} \quad (\text{S297})$$

$$[R_{W,X,\Theta}^{E_{32}} (G^{E_{32}})]_{2,2} = \frac{\psi G_{1,1}^{E_{32}} (\zeta - \eta)}{\gamma \phi} + \sqrt{\rho} \psi G_{4,5}^{E_{32}} \quad (\text{S298})$$

$$[R_{W,X,\Theta}^{E_{32}} (G^{E_{32}})]_{2,7} = \frac{\psi G_{9,1}^{E_{32}} (\zeta - \eta)}{\gamma \phi} + \sqrt{\rho} \psi G_{8,5}^{E_{32}} + \sqrt{\rho} \psi G_{13,5}^{E_{32}} + \frac{\psi G_{1,1}^{E_{32}} (\zeta - \eta) (\zeta - \eta)}{\gamma \phi} \quad (\text{S299})$$

$$[R_{W,X,\Theta}^{E_{32}} (G^{E_{32}})]_{4,5} = \sqrt{\rho} G_{2,2}^{E_{32}} \quad (\text{S300})$$

$$[R_{W,X,\Theta}^{E_{32}} (G^{E_{32}})]_{4,10} = \sqrt{\rho} G_{7,2}^{E_{32}} \quad (\text{S301})$$

$$[R_{W,X,\Theta}^{E_{32}} (G^{E_{32}})]_{6,3} = -\frac{\sqrt{\rho} G_{1,1}^{E_{32}}}{\gamma \phi} \quad (\text{S302})$$

$$[R_{W,X,\Theta}^{E_{32}} (G^{E_{32}})]_{6,12} = -\frac{\sqrt{\rho} G_{9,1}^{E_{32}}}{\gamma \phi} \quad (\text{S303})$$

$$[R_{W,X,\Theta}^{E_{32}} (G^{E_{32}})]_{7,2} = \frac{\psi G_{1,9}^{E_{32}} (\zeta - \eta)}{\gamma \phi} + \sqrt{\rho} \psi G_{4,10}^{E_{32}} \quad (\text{S304})$$

$$[R_{W,X,\Theta}^{E_{32}} (G^{E_{32}})]_{7,7} = \frac{\psi G_{9,9}^{E_{32}} (\zeta - \eta)}{\gamma \phi} + \sqrt{\rho} \psi G_{8,10}^{E_{32}} + \sqrt{\rho} \psi G_{13,10}^{E_{32}} + \frac{\psi G_{1,9}^{E_{32}} (\zeta - \eta) (\zeta - \eta)}{\gamma \phi} \quad (\text{S305})$$

$$[R_{W,X,\theta}^{E_{32}}(G^{E_{32}})]_{8,5} = \sqrt{\rho}G_{2,7}^{E_{32}} \quad (\text{S306})$$

$$[R_{W,X,\theta}^{E_{32}}(G^{E_{32}})]_{8,10} = \sqrt{\rho}G_{7,7}^{E_{32}} \quad (\text{S307})$$

$$[R_{W,X,\theta}^{E_{32}}(G^{E_{32}})]_{9,1} = \frac{G_{2,7}^{E_{32}}(\zeta - \eta)}{\gamma} - \frac{\sqrt{\rho}G_{6,12}^{E_{32}}}{\gamma} \quad (\text{S308})$$

$$[R_{W,X,\theta}^{E_{32}}(G^{E_{32}})]_{9,9} = \frac{G_{7,7}^{E_{32}}(\zeta - \eta)}{\gamma} - \frac{\sqrt{\rho}G_{11,12}^{E_{32}}}{\gamma} \quad (\text{S309})$$

$$[R_{W,X,\theta}^{E_{32}}(G^{E_{32}})]_{9,16} = -\frac{\sqrt{\rho}G_{15,12}^{E_{32}}}{\gamma} \quad (\text{S310})$$

$$[R_{W,X,\theta}^{E_{32}}(G^{E_{32}})]_{11,3} = -\frac{\sqrt{\rho}G_{1,9}^{E_{32}}}{\gamma\phi} \quad (\text{S311})$$

$$[R_{W,X,\theta}^{E_{32}}(G^{E_{32}})]_{11,12} = -\frac{\sqrt{\rho}G_{9,9}^{E_{32}}}{\gamma\phi} \quad (\text{S312})$$

$$[R_{W,X,\theta}^{E_{32}}(G^{E_{32}})]_{13,5} = \sqrt{\rho}G_{2,7}^{E_{32}} \quad (\text{S313})$$

$$[R_{W,X,\theta}^{E_{32}}(G^{E_{32}})]_{13,10} = \sqrt{\rho}G_{7,7}^{E_{32}} \quad (\text{S314})$$

$$[R_{W,X,\theta}^{E_{32}}(G^{E_{32}})]_{15,3} = -\frac{\sqrt{\rho}G_{1,16}^{E_{32}}}{\gamma\phi} \quad (\text{S315})$$

$$[R_{W,X,\theta}^{E_{32}}(G^{E_{32}})]_{15,12} = -\frac{\sqrt{\rho}G_{9,16}^{E_{32}}}{\gamma\phi}, \quad (\text{S316})$$

and the remaining entries of  $R_{W,X,\theta}^{E_{32}}(G^{E_{32}})$  are zero. As above, plugging these expressions into eqn. (S293) and explicitly performing the block-matrix inverse yields the following set of coupled equations,

$$G_{7,2}^{E_{32}} = \gamma^2 \sqrt{\rho} \bar{\tau}_1^2 \psi G_{8,5}^{E_{32}} + \gamma^2 \sqrt{\rho} \bar{\tau}_1^2 \psi G_{13,5}^{E_{32}} + \frac{\gamma \bar{\tau}_1^2 \psi G_{9,1}^{E_{32}} (\zeta - \eta)}{\phi} + \frac{\gamma^2 \tau_1 \bar{\tau}_1^2 \psi (\zeta - \eta) (\zeta - \eta)}{\phi} \quad (\text{S317})$$

$$G_{8,3}^{E_{32}} = \mathcal{I}_{\frac{1}{2},1} \zeta - \mathcal{I}_{\frac{1}{2},1} \eta - \frac{\gamma \bar{\tau}_1 \mathcal{I}_{\frac{3}{2},1} \rho}{\psi} \quad (\text{S318})$$

$$G_{8,4}^{E_{32}} = -\frac{\gamma \bar{\tau}_1 \mathcal{I}_{1,1} (\rho \tau_1 \psi (\zeta - \eta) + \phi \rho)}{\psi \phi} \quad (\text{S319})$$

$$G_{8,5}^{E_{32}} = -\frac{\mathcal{I}_{1,1} (\rho \tau_1 \psi (\zeta - \eta) + \phi \rho)}{\sqrt{\rho} \psi \phi} \quad (\text{S320})$$

$$G_{8,6}^{E_{32}} = -\frac{\sqrt{\rho} \tau_1 (\psi \mathcal{I}_{\frac{1}{2},1} \zeta - \psi \mathcal{I}_{\frac{1}{2},1} \eta - \gamma \bar{\tau}_1 \mathcal{I}_{\frac{3}{2},1} \rho)}{\psi \phi} \quad (\text{S321})$$

$$G_{9,1}^{E_{32}} = \gamma \tau_1^2 G_{7,2}^{E_{32}} (\zeta - \eta) - \gamma \sqrt{\rho} \tau_1^2 G_{11,3}^{E_{32}} + \gamma^2 \tau_1^2 \bar{\tau}_1 (\zeta - \eta) (\zeta - \eta) \quad (\text{S322})$$

$$G_{10,3}^{E_{32}} = \sqrt{\rho} \phi G_{7,2}^{E_{32}} \mathcal{I}_{\frac{1}{2},2} - \gamma \rho^{3/2} \bar{\tau}_1^2 G_{9,1}^{E_{32}} \mathcal{I}_{\frac{3}{2},2} - \frac{\gamma \sqrt{\rho} \bar{\tau}_1 \phi (-\psi \mathcal{I}_{\frac{1}{2},2} \zeta + \psi \mathcal{I}_{\frac{1}{2},2} \eta + \gamma \bar{\tau}_1 \mathcal{I}_{\frac{3}{2},2} \rho)}{\psi} \quad (\text{S323})$$

$$G_{10,4}^{E_{32}} = \sqrt{\rho} \phi G_{7,2}^{E_{32}} \mathcal{I}_{0,2} - \gamma \rho^{3/2} \bar{\tau}_1^2 G_{9,1}^{E_{32}} \mathcal{I}_{1,2} - \frac{\gamma^2 \sqrt{\rho} \bar{\tau}_1^2 \mathcal{I}_{1,2} (\rho \tau_1 \psi (\zeta - \eta) + \phi \rho)}{\psi} \quad (\text{S324})$$

$$G_{10,5}^{E_{32}} = -\rho \tau_1 G_{7,2}^{E_{32}} \mathcal{I}_{1,2} - \rho \bar{\tau}_1 G_{9,1}^{E_{32}} \mathcal{I}_{1,2} - \frac{\mathcal{I}_{1,2} (\gamma \bar{\tau}_1 \phi \rho + x \psi \zeta - x \psi \eta)}{\psi} \quad (\text{S325})$$

$$G_{10,6}^{E_{32}} = -\rho \tau_1 G_{7,2}^{E_{32}} \mathcal{I}_{\frac{1}{2},2} - \rho \bar{\tau}_1 G_{9,1}^{E_{32}} \mathcal{I}_{\frac{1}{2},2} + \frac{\gamma^2 \rho \tau_1 \bar{\tau}_1^2 \mathcal{I}_{\frac{3}{2},2} \rho}{\psi} + x \mathcal{I}_{\frac{1}{2},2} (\eta - \zeta) \quad (\text{S326})$$

$$G_{11,3}^{E_{32}} = \sqrt{\rho}\phi G_{7,2}^{E_{32}} \mathcal{I}_{1,2} - \gamma \rho^{3/2} \bar{\tau}_1^2 G_{9,1}^{E_{32}} \mathcal{I}_{2,2} - \frac{\gamma \sqrt{\rho} \bar{\tau}_1 \phi (-\psi \mathcal{I}_{1,2} \zeta + \psi \mathcal{I}_{1,2} \eta + \gamma \bar{\tau}_1 \mathcal{I}_{2,2} \rho)}{\psi} \quad (\text{S327})$$

$$G_{11,4}^{E_{32}} = \sqrt{\rho}\phi G_{7,2}^{E_{32}} \mathcal{I}_{\frac{3}{2},2} - \gamma \rho^{3/2} \bar{\tau}_1^2 G_{9,1}^{E_{32}} \mathcal{I}_{\frac{3}{2},2} - \frac{\gamma^2 \sqrt{\rho} \bar{\tau}_1^2 \mathcal{I}_{\frac{3}{2},2} (\rho \tau_1 \psi (\zeta - \eta) + \phi \rho)}{\psi} \quad (\text{S328})$$

$$G_{11,5}^{E_{32}} = -\rho \tau_1 G_{7,2}^{E_{32}} \mathcal{I}_{\frac{3}{2},2} - \rho \bar{\tau}_1 G_{9,1}^{E_{32}} \mathcal{I}_{\frac{3}{2},2} - \frac{\mathcal{I}_{\frac{3}{2},2} (\gamma \bar{\tau}_1 \phi \rho + x \psi \zeta - x \psi \eta)}{\psi} \quad (\text{S329})$$

$$G_{12,4}^{E_{32}} = -\rho \tau_1 G_{7,2}^{E_{32}} \mathcal{I}_{\frac{1}{2},2} - \rho \bar{\tau}_1 G_{9,1}^{E_{32}} \mathcal{I}_{\frac{1}{2},2} + \mathcal{I}_{\frac{3}{2},2} \left( \frac{\gamma^2 \rho \tau_1 \bar{\tau}_1^2 \rho}{\psi} + \frac{x^2 (\zeta - \eta)}{\phi} \right) \quad (\text{S330})$$

$$G_{12,5}^{E_{32}} = -\frac{\sqrt{\rho} G_{9,1}^{E_{32}} \mathcal{I}_{\frac{1}{2},2}}{\gamma} + \frac{\rho^{3/2} \tau_1^2 G_{7,2}^{E_{32}} \mathcal{I}_{\frac{3}{2},2}}{\phi} + \frac{\mathcal{I}_{\frac{3}{2},2} (\gamma \rho^2 \tau_1^2 \bar{\tau}_1 \psi (\zeta - \eta) + x \phi \rho)}{\sqrt{\rho} \psi \phi} \quad (\text{S331})$$

$$G_{12,6}^{E_{32}} = -\frac{\sqrt{\rho} G_{9,1}^{E_{32}} \mathcal{I}_{0,2}}{\gamma} + \frac{\rho^{3/2} \tau_1^2 G_{7,2}^{E_{32}} \mathcal{I}_{1,2}}{\phi} + \frac{\gamma \rho^2 \tau_1^2 \bar{\tau}_1 \mathcal{I}_{1,2} (\zeta - \eta) - \frac{x^2 \mathcal{I}_{2,2} \rho}{\psi}}{\sqrt{\rho} \phi} \quad (\text{S332})$$

$$G_{13,3}^{E_{32}} = -\rho \tau_1 G_{7,2}^{E_{32}} \mathcal{I}_{\frac{3}{2},2} - \rho \bar{\tau}_1 G_{9,1}^{E_{32}} \mathcal{I}_{\frac{3}{2},2} + \frac{\gamma^2 \rho \tau_1 \bar{\tau}_1^2 \mathcal{I}_{\frac{5}{2},2} \rho}{\psi} + x \mathcal{I}_{\frac{3}{2},2} (\eta - \zeta) \quad (\text{S333})$$

$$G_{13,4}^{E_{32}} = -\rho \tau_1 G_{7,2}^{E_{32}} \mathcal{I}_{1,2} - \rho \bar{\tau}_1 G_{9,1}^{E_{32}} \mathcal{I}_{1,2} + \mathcal{I}_{2,2} \left( \frac{\gamma^2 \rho \tau_1 \bar{\tau}_1^2 \rho}{\psi} + \frac{x^2 (\zeta - \eta)}{\phi} \right) \quad (\text{S334})$$

$$G_{13,5}^{E_{32}} = -\frac{\sqrt{\rho} G_{9,1}^{E_{32}} \mathcal{I}_{1,2}}{\gamma} + \frac{\rho^{3/2} \tau_1^2 G_{7,2}^{E_{32}} \mathcal{I}_{2,2}}{\phi} + \frac{\mathcal{I}_{2,2} (\gamma \rho^2 \tau_1^2 \bar{\tau}_1 \psi (\zeta - \eta) + x \phi \rho)}{\sqrt{\rho} \psi \phi} \quad (\text{S335})$$

$$G_{13,6}^{E_{32}} = -\frac{\sqrt{\rho} G_{9,1}^{E_{32}} \mathcal{I}_{\frac{1}{2},2}}{\gamma} + \frac{\rho^{3/2} \tau_1^2 G_{7,2}^{E_{32}} \mathcal{I}_{\frac{3}{2},2}}{\phi} + \frac{\gamma \rho^2 \tau_1^2 \bar{\tau}_1 \mathcal{I}_{\frac{3}{2},2} (\zeta - \eta) - \frac{x^2 \mathcal{I}_{\frac{5}{2},2} \rho}{\psi}}{\sqrt{\rho} \phi} \quad (\text{S336})$$

$$G_{13,8}^{E_{32}} = -\frac{x \mathcal{I}_{1,1}}{\phi} \quad (\text{S337})$$

$$G_{14,3}^{E_{32}} = \sqrt{\rho} \tau_1 \mathcal{I}_{\frac{3}{2},2}^\beta G_{7,2}^{E_{32}} + \sqrt{\rho} \bar{\tau}_1 \mathcal{I}_{\frac{3}{2},2}^\beta G_{9,1}^{E_{32}} + \frac{x \psi \mathcal{I}_{\frac{3}{2},2}^\beta (\zeta - \eta) - \gamma^2 \rho \tau_1 \bar{\tau}_1^2 \mathcal{I}_{\frac{5}{2},2}^\beta \rho}{\sqrt{\rho} \psi} \quad (\text{S338})$$

$$G_{14,4}^{E_{32}} = \sqrt{\rho} \tau_1 \mathcal{I}_{1,2}^\beta G_{7,2}^{E_{32}} + \sqrt{\rho} \bar{\tau}_1 \mathcal{I}_{1,2}^\beta G_{9,1}^{E_{32}} - \frac{\mathcal{I}_{2,2}^\beta (\gamma^2 \rho \tau_1 \bar{\tau}_1^2 \phi \rho + \psi x^2 \zeta - \psi x^2 \eta)}{\sqrt{\rho} \psi \phi} \quad (\text{S339})$$

$$G_{14,5}^{E_{32}} = \frac{\mathcal{I}_{1,2}^\beta G_{9,1}^{E_{32}}}{\gamma} - \frac{\rho \tau_1^2 \mathcal{I}_{2,2}^\beta G_{7,2}^{E_{32}}}{\phi} + \frac{\mathcal{I}_{2,2}^\beta \left( \frac{\gamma \rho^2 \tau_1^2 \bar{\tau}_1 (\eta - \zeta)}{\phi} - \frac{x \rho}{\psi} \right)}{\rho} \quad (\text{S340})$$

$$G_{14,6}^{E_{32}} = \frac{\mathcal{I}_{\frac{1}{2},2}^\beta G_{9,1}^{E_{32}}}{\gamma} - \frac{\rho \tau_1^2 \mathcal{I}_{\frac{3}{2},2}^\beta G_{7,2}^{E_{32}}}{\phi} + \frac{\gamma \rho^2 \tau_1^2 \bar{\tau}_1 \mathcal{I}_{\frac{3}{2},2}^\beta (\eta - \zeta) + \frac{x^2 \mathcal{I}_{\frac{5}{2},2}^\beta \rho}{\psi}}{\rho \phi} \quad (\text{S341})$$

$$G_{14,8}^{E_{32}} = \frac{x \mathcal{I}_{1,1}^\beta}{\sqrt{\rho} \phi} \quad (\text{S342})$$

$$G_{14,11}^{E_{32}} = \frac{\tau_1 \mathcal{I}_{\frac{1}{2},1}^\beta}{\phi} \quad (\text{S343})$$

$$G_{14,13}^{E_{32}} = -\frac{\mathcal{I}_{0,1}^\beta}{\sqrt{\rho}} \quad (\text{S344})$$

$$G_{15,3}^{E_{32}} = \sqrt{\rho} \tau_1 \mathcal{I}_{2,2}^\beta G_{7,2}^{E_{32}} + \sqrt{\rho} \bar{\tau}_1 \mathcal{I}_{2,2}^\beta G_{9,1}^{E_{32}} + \frac{x \psi \mathcal{I}_{2,2}^\beta (\zeta - \eta) - \gamma^2 \rho \tau_1 \bar{\tau}_1^2 \mathcal{I}_{3,2}^\beta \rho}{\sqrt{\rho} \psi} \quad (\text{S345})$$

$$G_{15,4}^{E_{32}} = \sqrt{\rho} \tau_1 \mathcal{I}_{\frac{3}{2},2}^\beta G_{7,2}^{E_{32}} + \sqrt{\rho} \bar{\tau}_1 \mathcal{I}_{\frac{3}{2},2}^\beta G_{9,1}^{E_{32}} - \frac{\mathcal{I}_{\frac{5}{2},2}^\beta (\gamma^2 \rho \tau_1 \bar{\tau}_1^2 \phi \rho + \psi x^2 \zeta - \psi x^2 \eta)}{\sqrt{\rho} \psi \phi} \quad (\text{S346})$$

$$G_{15,5}^{E_{32}} = \frac{\mathcal{I}_{\frac{3}{2},2}^\beta G_{9,1}^{E_{32}}}{\gamma} - \frac{\rho \tau_1^2 \mathcal{I}_{\frac{5}{2},2}^\beta G_{7,2}^{E_{32}}}{\phi} - \frac{\mathcal{I}_{\frac{5}{2},2}^\beta (\gamma \rho^2 \tau_1^2 \bar{\tau}_1 \psi (\zeta - \eta) + x \phi \rho)}{\rho \psi \phi} \quad (\text{S347})$$

$$G_{15,6}^{E_{32}} = \frac{\mathcal{I}_{1,2}^\beta G_{9,1}^{E_{32}}}{\gamma} - \frac{\rho \tau_1^2 \mathcal{I}_{2,2}^\beta G_{7,2}^{E_{32}}}{\phi} + \frac{\gamma \rho^2 \tau_1^2 \bar{\tau}_1 \mathcal{I}_{2,2}^\beta (\eta - \zeta) + \frac{x^2 \mathcal{I}_{3,2}^\beta \rho}{\psi}}{\rho \phi} \quad (\text{S348})$$

$$G_{15,8}^{E_{32}} = \frac{x \mathcal{I}_{\frac{3}{2},1}^\beta}{\sqrt{\rho} \phi} \quad (\text{S349})$$

$$G_{15,10}^{E_{32}} = \frac{\tau_1 \mathcal{I}_{\frac{3}{2},1}^\beta}{\phi} \quad (\text{S350})$$

$$G_{15,12}^{E_{32}} = -\frac{\mathcal{I}_{1,1}^\beta}{\sqrt{\rho}} \quad (\text{S351})$$

$$G_{15,14}^{E_{32}} = \frac{\mathcal{I}_{\frac{1}{2},0}}{\phi} \quad (\text{S352})$$

$$G_{16,1}^{E_{32}} = \tau_1^2 \mathcal{I}_{1,1}^\beta G_{7,2}^{E_{32}} (\zeta - \eta) - \sqrt{\rho} \tau_1^2 \mathcal{I}_{1,1}^\beta G_{11,3}^{E_{32}} + \gamma \tau_1^2 \bar{\tau}_1 \mathcal{I}_{1,1}^\beta (\zeta - \eta) (\zeta - \eta) - \sqrt{\rho} \tau_1 G_{15,3}^{E_{32}} \quad (\text{S353})$$

$$G_{16,9}^{E_{32}} = \tau_1 \mathcal{I}_{1,1}^\beta \quad (\text{S354})$$

$$G_{1,1}^{E_{32}} = G_{9,9}^{E_{32}} = \gamma \tau_1 \quad (\text{S355})$$

$$G_{2,2}^{E_{32}} = G_{7,7}^{E_{32}} = \gamma \bar{\tau}_1 \quad (\text{S356})$$

$$G_{3,6}^{E_{32}} = G_{12,11}^{E_{32}} = -\frac{\sqrt{\rho} \tau_1 \mathcal{I}_{0,1}}{\phi} \quad (\text{S357})$$

$$G_{4,5}^{E_{32}} = G_{13,10}^{E_{32}} = -\frac{\sqrt{\rho} \tau_1 \mathcal{I}_{1,1}}{\phi} \quad (\text{S358})$$

$$G_{6,3}^{E_{32}} = G_{11,12}^{E_{32}} = \gamma \sqrt{\rho} \bar{\tau}_1 \mathcal{I}_{1,1} \quad (\text{S359})$$

$$G_{11,6}^{E_{32}} = G_{12,3}^{E_{32}} = -\rho \tau_1 G_{7,2}^{E_{32}} \mathcal{I}_{1,2} - \rho \bar{\tau}_1 G_{9,1}^{E_{32}} \mathcal{I}_{1,2} + \frac{\gamma^2 \rho \tau_1 \bar{\tau}_1^2 \mathcal{I}_{2,2} \rho}{\psi} + x \mathcal{I}_{1,2} (\eta - \zeta) \quad (\text{S360})$$

$$G_{14,10}^{E_{32}} = G_{15,11}^{E_{32}} = \frac{\tau_1 \mathcal{I}_{1,1}^\beta}{\phi} \quad (\text{S361})$$

$$G_{14,12}^{E_{32}} = G_{15,13}^{E_{32}} = -\frac{\mathcal{I}_{\frac{1}{2},1}^\beta}{\sqrt{\rho}} \quad (\text{S362})$$

$$G_{5,4}^{E_{32}} = G_{10,8}^{E_{32}} = G_{10,13}^{E_{32}} = \gamma \sqrt{\rho} \bar{\tau}_1 \mathcal{I}_{0,1} \quad (\text{S363})$$

$$G_{3,5}^{E_{32}} = G_{4,6}^{E_{32}} = G_{12,10}^{E_{32}} = G_{13,11}^{E_{32}} = -\frac{\sqrt{\rho} \tau_1 \mathcal{I}_{\frac{1}{2},1}}{\phi} \quad (\text{S364})$$

$$G_{4,3}^{E_{32}} = G_{6,5}^{E_{32}} = G_{11,10}^{E_{32}} = G_{13,12}^{E_{32}} = \mathcal{I}_{\frac{1}{2},1} \quad (\text{S365})$$

$$G_{8,8}^{E_{32}} = G_{14,14}^{E_{32}} = G_{15,15}^{E_{32}} = G_{16,16}^{E_{32}} = 1 \quad (\text{S366})$$

$$G_{3,4}^{E_{32}} = G_{5,6}^{E_{32}} = G_{10,11}^{E_{32}} = G_{12,8}^{E_{32}} = G_{12,13}^{E_{32}} = -\frac{x \mathcal{I}_{\frac{1}{2},1}}{\phi} \quad (\text{S367})$$

$$G_{5,3}^{E_{32}} = G_{6,4}^{E_{32}} = G_{10,12}^{E_{32}} = G_{11,8}^{E_{32}} = G_{11,13}^{E_{32}} = \gamma \sqrt{\rho} \bar{\tau}_1 \mathcal{I}_{\frac{1}{2},1} \quad (\text{S368})$$

$$G_{3,3}^{E_{32}} = G_{4,4}^{E_{32}} = G_{5,5}^{E_{32}} = G_{6,6}^{E_{32}} = G_{10,10}^{E_{32}} = G_{11,11}^{E_{32}} = G_{12,12}^{E_{32}} = G_{13,13}^{E_{32}} = \mathcal{I}_{0,1}, \quad (\text{S369})$$

Here we have used the relations in eqns. (S266)-(S287), the definition of  $\mathcal{I}_{a,b}^\beta$ , as well as the results in Sec. G.4.1 to simplify the expressions. It is straightforward algebra to solve these equations for the undetermined entries of  $G^{E_{32}}$  and thereby obtain the following expression for  $E_{32}$ ,

$$E_{32} = \frac{(\eta - \zeta) A_{32} + \rho B_{32}}{D_{32}}, \quad (\text{S370})$$

where,

$$\begin{aligned}
A_{32} = & -\rho^3 \tau_1 \psi^2 x^4 \mathcal{I}_{1,1} \mathcal{I}_{2,2} \mathcal{I}_{2,2}^\beta + \rho^2 \tau_1 \psi x^3 \mathcal{I}_{2,2} \mathcal{I}_{2,2}^\beta (\rho \phi + x \psi (\zeta - \eta)) \\
& - \rho^3 \tau_1 \psi^2 x^3 \phi \mathcal{I}_{1,1} \mathcal{I}_{1,2} \mathcal{I}_{2,2}^\beta + \rho^2 \tau_1 \psi^2 x^2 \mathcal{I}_{1,1} \mathcal{I}_{1,1}^\beta (\eta - \zeta) \\
& + \rho^2 \tau_1 \psi^2 x^2 \mathcal{I}_{1,1} \mathcal{I}_{2,2}^\beta (\rho + x(\zeta - \eta)) + \rho^2 \tau_1 \psi x^2 \phi \mathcal{I}_{1,2} \mathcal{I}_{2,2}^\beta (\rho \phi + x \psi (\zeta - \eta)) \\
& + \rho^3 \tau_1 \psi^2 x^2 \phi \mathcal{I}_{1,1} \mathcal{I}_{1,2} \mathcal{I}_{1,1}^\beta - \rho^2 \tau_1 \psi x \phi \mathcal{I}_{1,2} \mathcal{I}_{1,1}^\beta (\rho \phi + x \psi (\zeta - \eta)) \\
& + \rho \tau_1 \psi x \mathcal{I}_{1,1}^\beta (\zeta - \eta) (\rho \phi + x \psi (\zeta - \eta)) \\
& - \rho \tau_1 \psi x \mathcal{I}_{2,2}^\beta (\rho + x(\zeta - \eta)) (\rho \phi + x \psi (\zeta - \eta))
\end{aligned} \tag{S371}$$

$$\begin{aligned}
B_{32} = & -\rho^2 \psi x^6 \mathcal{I}_{2,2}^2 \mathcal{I}_{3,2}^\beta - 2\rho^2 \psi x^5 \phi \mathcal{I}_{2,2}^2 \mathcal{I}_{2,2}^\beta + 2\rho \psi x^4 \phi \mathcal{I}_{1,2} \mathcal{I}_{3,2}^\beta (\eta - \zeta) \\
& - 2\rho^2 \psi x^4 \phi^2 \mathcal{I}_{1,2} \mathcal{I}_{2,2} \mathcal{I}_{2,2}^\beta + \rho^2 \psi x^4 \phi^2 \mathcal{I}_{1,2}^2 \mathcal{I}_{3,2}^\beta + \rho^2 \psi x^4 \phi \mathcal{I}_{2,2}^2 \mathcal{I}_{1,1}^\beta \\
& + \rho^2 \psi x^4 \phi \mathcal{I}_{1,1} \mathcal{I}_{2,2} \mathcal{I}_{2,2}^\beta + \rho^2 x^4 \mathcal{I}_{2,2} \mathcal{I}_{3,2}^\beta (\psi + \phi) \\
& + \rho x^3 \phi \mathcal{I}_{2,2} \mathcal{I}_{2,2}^\beta (\rho(\psi + \phi) + 2x\psi(\zeta - \eta)) \\
& + \rho^2 \psi x^3 \phi^2 \mathcal{I}_{1,2} \mathcal{I}_{2,2} \mathcal{I}_{1,1}^\beta + \rho^2 \psi x^3 \phi^2 \mathcal{I}_{1,1} \mathcal{I}_{1,2} \mathcal{I}_{2,2}^\beta + \rho \psi x^2 \phi \mathcal{I}_{1,1} \mathcal{I}_{1,1}^\beta (\zeta - \eta) \\
& - \rho x^2 \phi \mathcal{I}_{2,2} \mathcal{I}_{1,1}^\beta (\rho \phi + x \psi (\zeta - \eta)) - \rho \psi x^2 \phi \mathcal{I}_{1,1} \mathcal{I}_{2,2}^\beta (\rho + x(\zeta - \eta)) \\
& - \rho^2 \psi x^2 \phi^2 \mathcal{I}_{1,1} \mathcal{I}_{1,2} \mathcal{I}_{1,1}^\beta + \mathcal{I}_{3,2}^\beta (x^4 \psi (\zeta - \eta)^2 - \rho^2 x^2 \phi)
\end{aligned} \tag{S372}$$

$$\begin{aligned}
D_{32} = & -\rho^3 \psi x^4 \phi \mathcal{I}_{2,2}^2 + 2\rho^2 \psi x^2 \phi^2 \mathcal{I}_{1,2} (\eta - \zeta) \\
& + \rho^3 \psi x^2 \phi^3 \mathcal{I}_{1,2}^2 + \rho^3 x^2 \phi \mathcal{I}_{2,2} (\psi + \phi) + \rho \phi (x^2 \psi (\zeta - \eta)^2 - \rho^2 \phi) .
\end{aligned} \tag{S373}$$

Further simplifications are possible using the raising and lowering identities in eqn. (S9), as well as the results in Sec. G.4.1 to obtain,

$$E_{32} = \frac{x^2}{\phi} \mathcal{I}_{3,2}^\beta - \rho \frac{\psi}{\phi} \frac{\partial x}{\partial \gamma} \left( \mathcal{I}_{1,1}^\beta (\omega + \phi \mathcal{I}_{1,2}) (\omega + \mathcal{I}_{1,1}) + \frac{\phi^2}{\psi} \gamma \bar{\tau}_1 \mathcal{I}_{1,2}^\beta \mathcal{I}_{2,2} + \gamma \tau_1 \mathcal{I}_{2,2}^\beta (\omega + \phi \mathcal{I}_{1,2}) \right), \tag{S374}$$

where

$$\frac{\partial x}{\partial \gamma} = - \frac{x}{\gamma + \rho \gamma (\tau_1 \psi / \phi + \bar{\tau}_1) (\omega + \phi \mathcal{I}_{1,2})}. \tag{S375}$$

#### G.4.5 $E_4$

The calculation of  $E_4$  proceeds exactly as in (Tripuraneni et al., 2021a,b) with the simple modification of including an additional factor  $\Sigma_\beta$  inside the final trace term, yielding

$$E_4 = \frac{x^2}{\phi} \mathcal{I}_{3,2}^\beta. \tag{S376}$$

### G.5 FINAL RESULT FOR BIAS, VARIANCE, AND TEST ERROR

Putting the above pieces together, we have,

$$B_\mu = \phi \mathcal{I}_{1,2}^\beta \tag{S377}$$

$$\begin{aligned}
V_\mu = & -\rho \frac{\psi}{\phi} \frac{\partial x}{\partial \gamma} \left( \mathcal{I}_{1,1}^\beta (\omega + \phi \mathcal{I}_{1,2}) (\omega + \mathcal{I}_{1,1}) + \frac{\phi^2}{\psi} \gamma \bar{\tau}_1 \mathcal{I}_{1,2}^\beta \mathcal{I}_{2,2} + \gamma \tau_1 \mathcal{I}_{2,2}^\beta (\omega + \phi \mathcal{I}_{1,2}) \right. \\
& \left. + \sigma_\varepsilon^2 \left( (\omega + \phi \mathcal{I}_{1,2}) (\omega + \mathcal{I}_{1,1}) + \frac{\phi}{\psi} \gamma \bar{\tau}_1 \mathcal{I}_{2,2} \right) \right).
\end{aligned} \tag{S378}$$

$$\tag{S379}$$

Some algebra shows that

$$E_\mu = B_\mu + V_\mu \tag{S380}$$

$$= -\frac{\partial_\gamma(\tau_1(\sigma_\varepsilon^2 + \mathcal{I}_{1,1}^\beta))}{\tau_1^2} - \sigma_\varepsilon^2 \quad (\text{S381})$$

$$= \frac{E_{\text{train}}}{\gamma^2 \tau_1^2} - \sigma_\varepsilon^2. \quad (\text{S382})$$

**Corollary G.1.** *In the setting of Theorem 3.1 as the ridge regularization constant  $\gamma \rightarrow 0$ ,  $E_\mu = B_\mu + V_\mu$  with  $B_\mu = \phi \mathcal{I}_{1,2}^\beta$  and  $V_\mu$  given by*

$$V_\mu \xrightarrow{\gamma \rightarrow 0} \frac{\min(\phi, \psi)}{|\phi - \psi|} (\sigma_\varepsilon^2 + \mathcal{I}_{1,1}^\beta) + \begin{cases} x \mathcal{I}_{2,2}^\beta & \text{if } \phi < \psi \\ \frac{x \mathcal{I}_{2,2}^\beta}{\omega + \phi \mathcal{I}_{1,2}} (\sigma_\varepsilon^2 + \mathcal{I}_{1,2}^\beta) & \text{otherwise} \end{cases}, \quad (\text{S383})$$

where  $x$  is the unique positive real root of  $x = \frac{\min(1, \phi/\psi)}{\omega + \mathcal{I}_{1,1}}$ .
